# Supplementary material for: Cross-sectional study of female sex workers in Soweto, South Africa: Factors associated with HIV infection
Source: PubMed Central journal article supplement (PMC5628807; doi:10.1371/journal.pone.0184775), 2017-10-05

## S1 Text. RDS Assumptions (Pdf)

Please see below RDSAT exported assumptions for homophily, convergence and bottleneck plots. These are supplied in evidence that all assumptions were met in relation to the RDS methodology.

### SAMPLE & POPULATION LEVEL HOMOPHILY

#### SAMPLE HOMOPHILY

HIV STATUS

Homophily = **1.06**

INTIMATE PARTNER VIOLENCE

Homophily = **0.99**

NON INTIMATE PARTNER SEXUAL  
ASSAULT

Homophily = **0.98**

#### POPULATION LEVEL HOMOPHILY

HIV STATUS

|             |             |
|-------------|-------------|
| negative    | positive    |
| <b>1.06</b> | <b>1.07</b> |

INTIMATE PARTNER VIOLENCE

|             |             |
|-------------|-------------|
| None        | some        |
| <b>0.99</b> | <b>1.01</b> |

NON INTIMATE PARTNER SEXUAL  
ASSAULT

|             |             |
|-------------|-------------|
| NONE        | SOME        |
| <b>0.97</b> | <b>0.97</b> |

Convergence plot of hivstatus

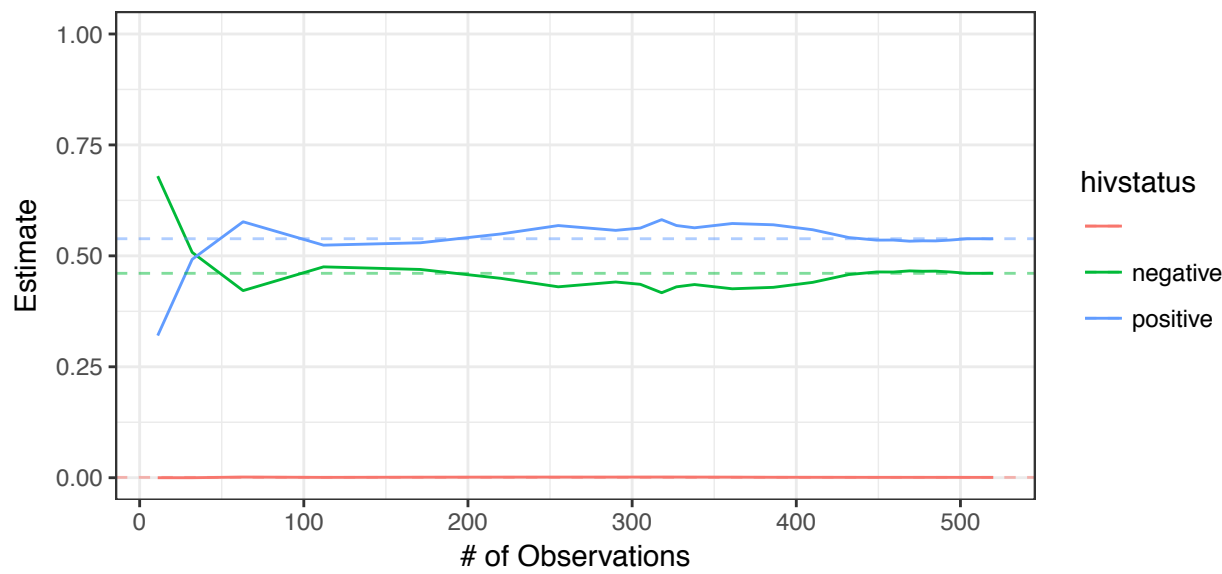

Convergence plot of any2nonip\_rapeEVERperp=1

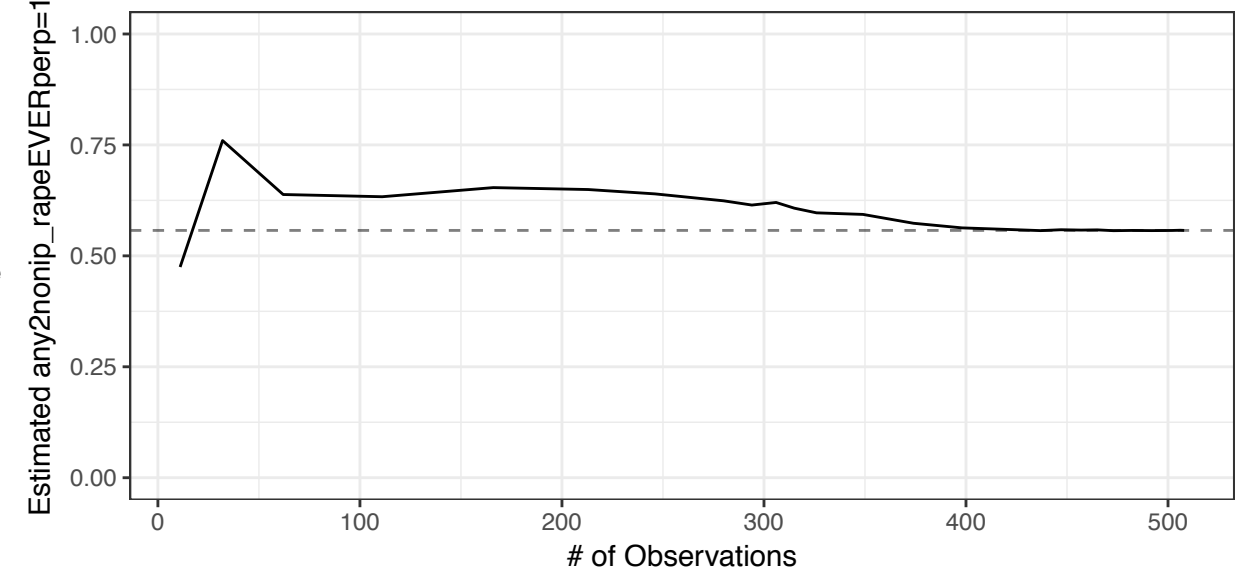

Convergence plot of ipphissexual

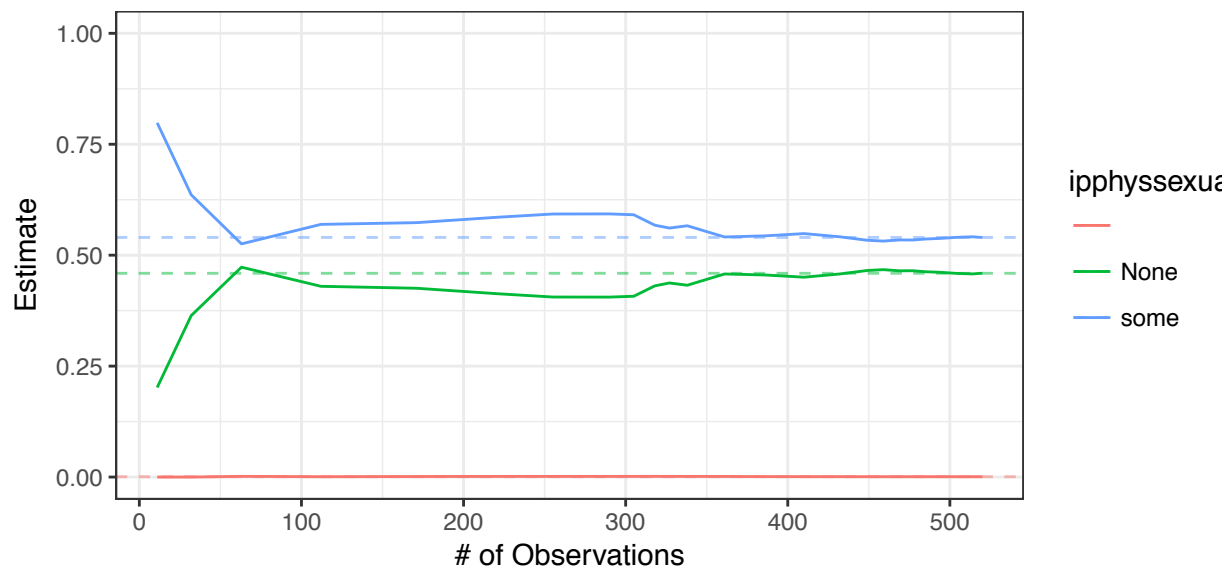

Convergence plot of edu\_cat2

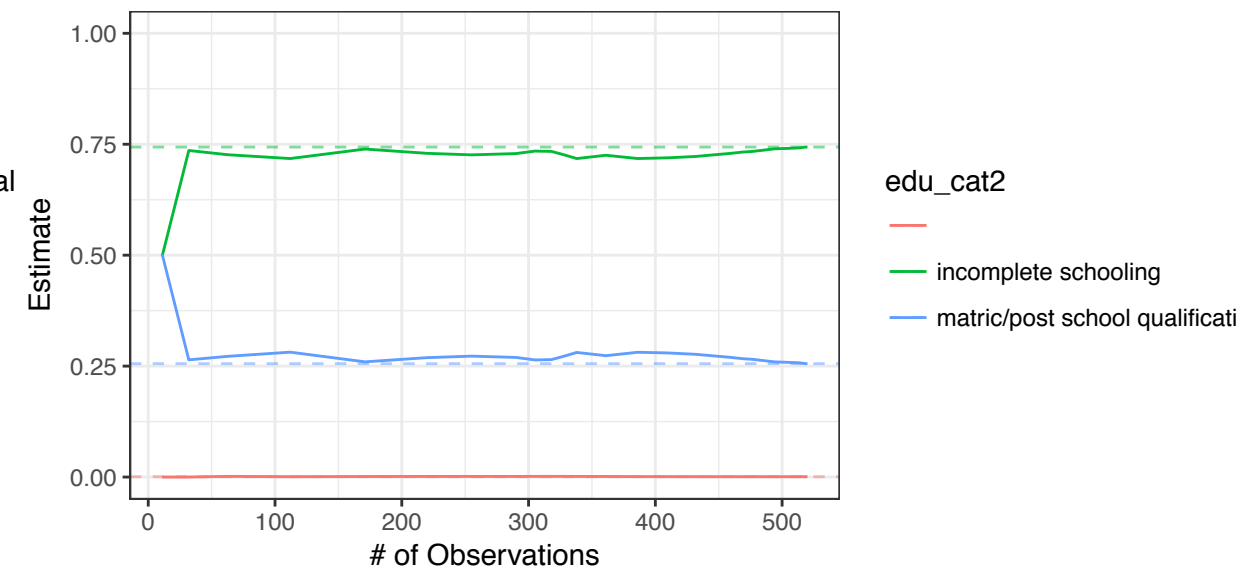

Convergence plot of NEW3agecat

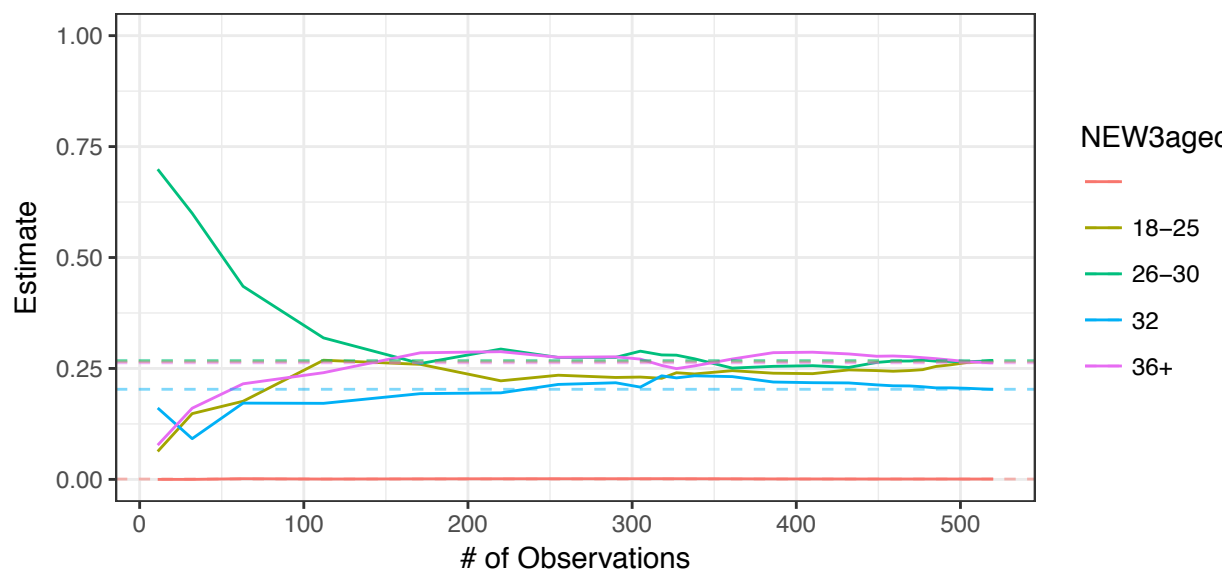

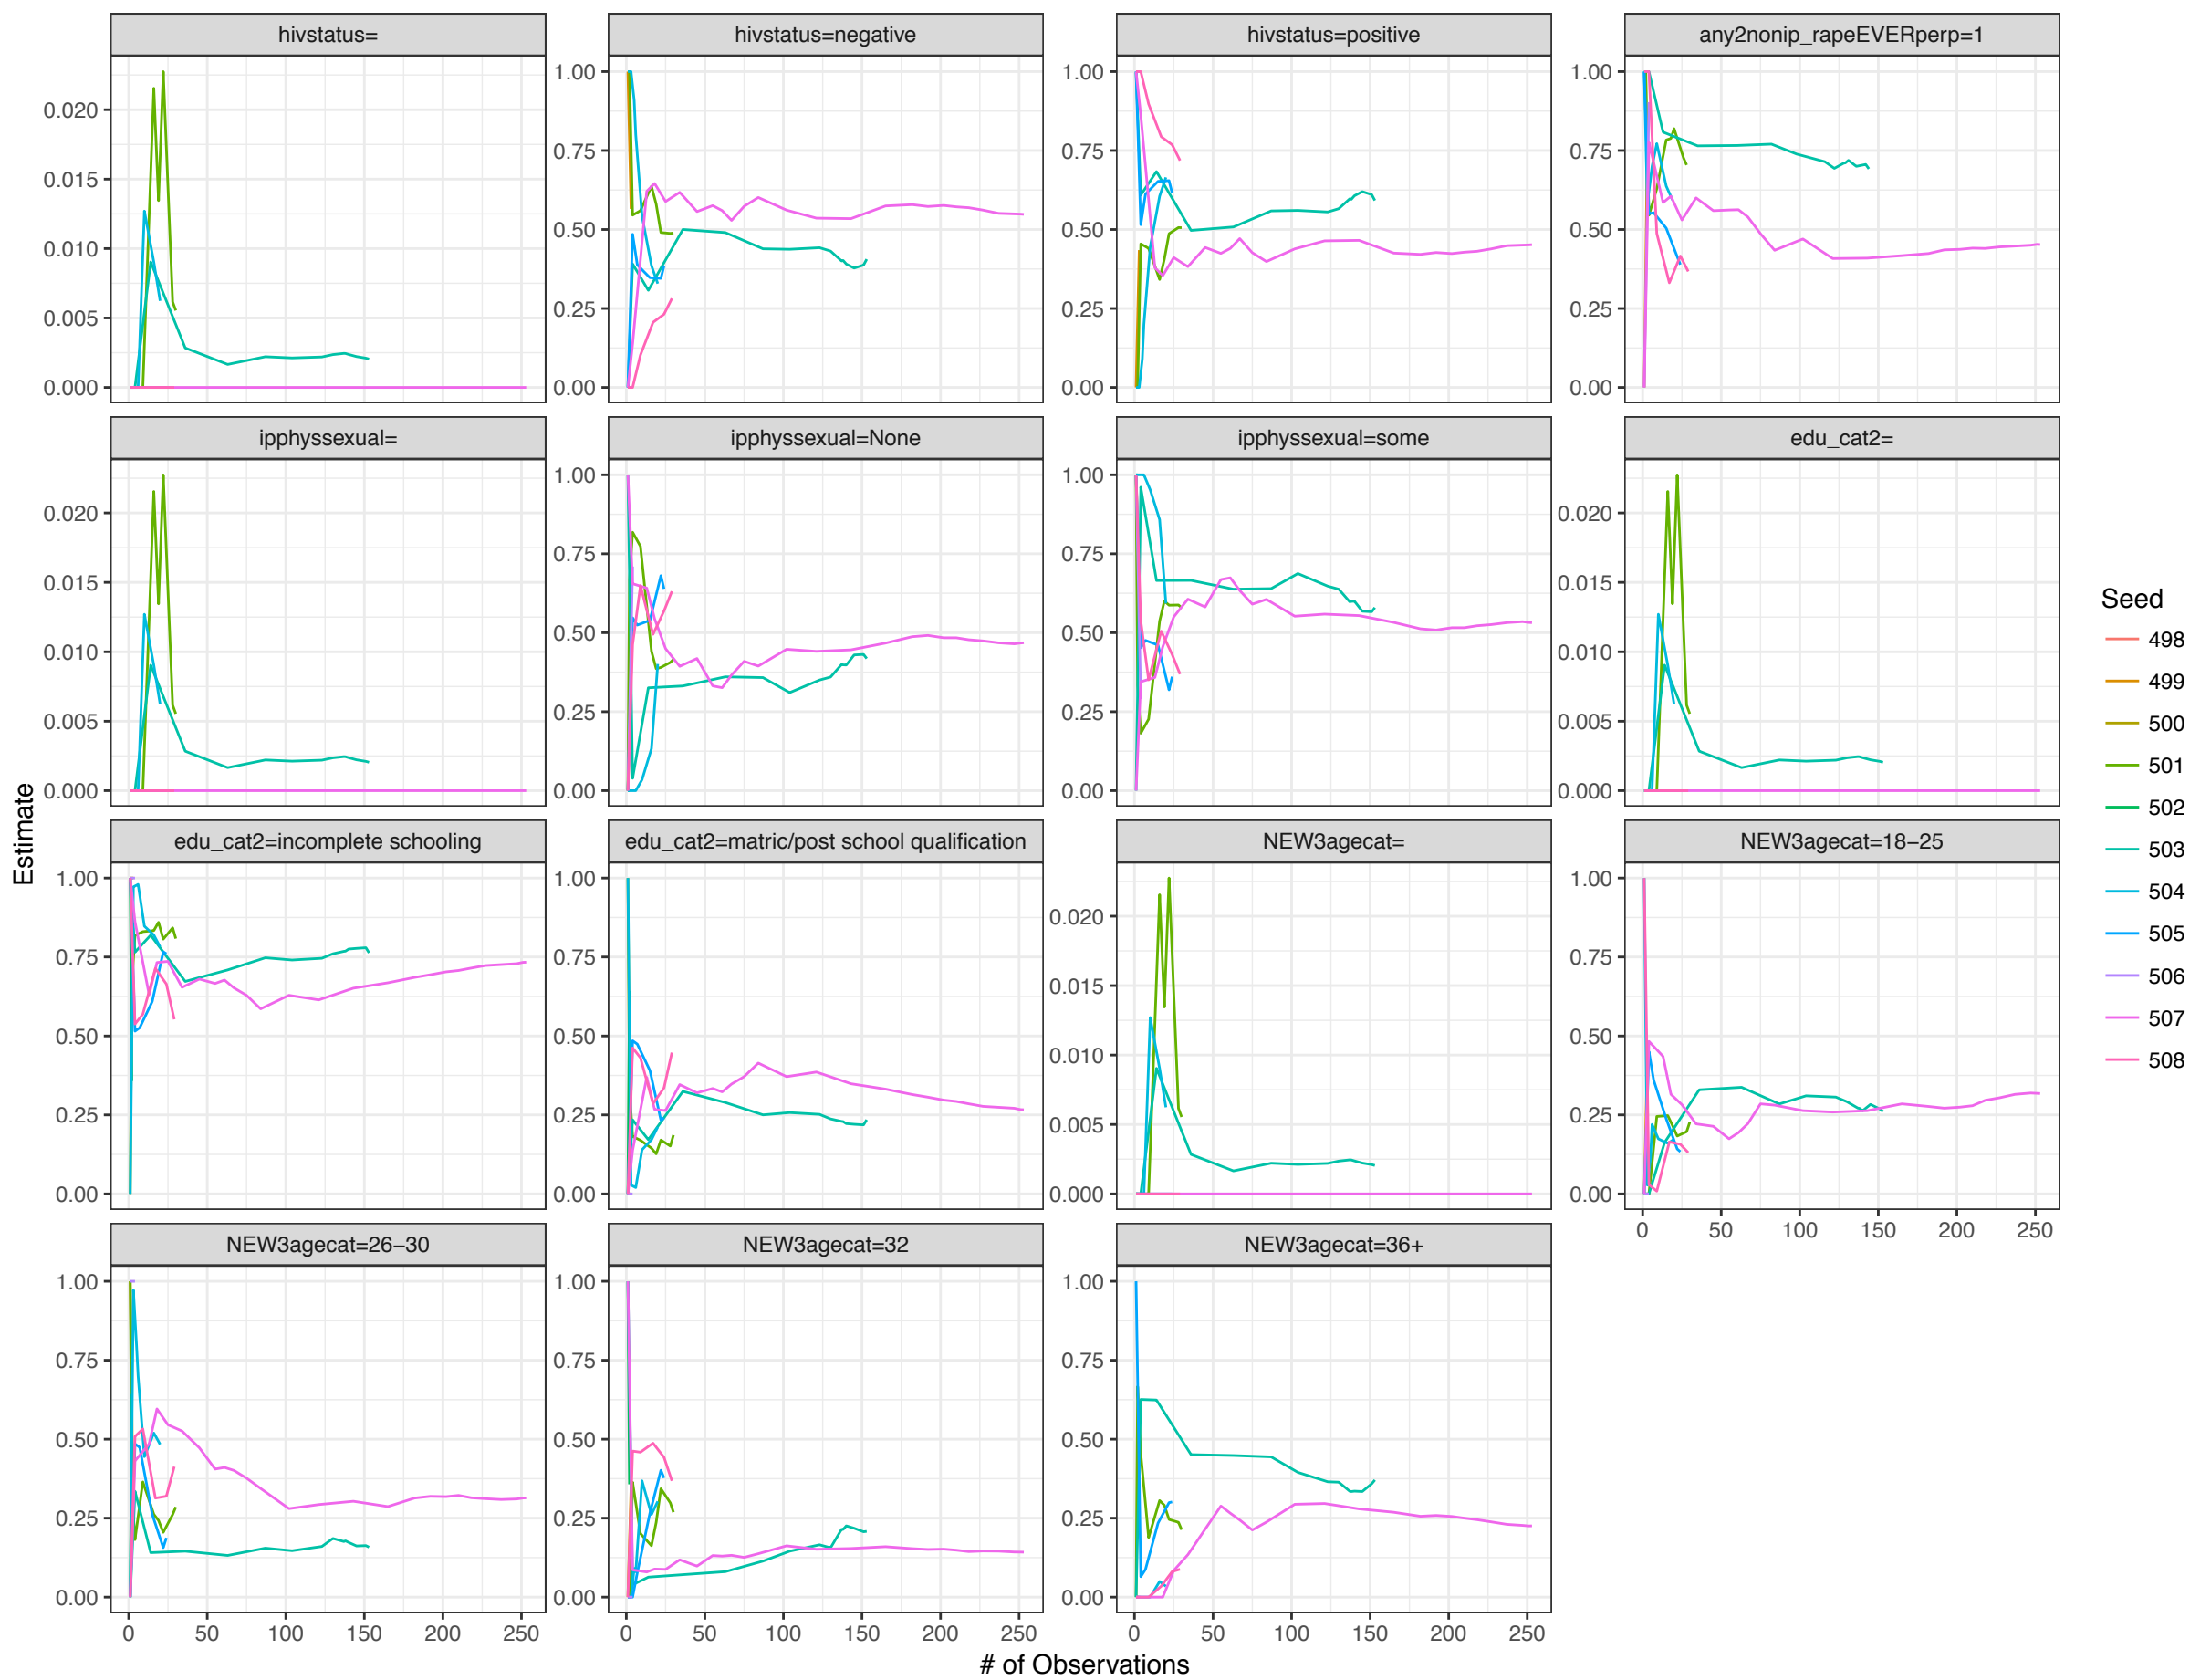

Supplement: pone.0184775.s001.pdf [file pone.0184775.s001.pdf]
