# Supplementary material for: Cross-sectional study of female sex workers in Soweto, South Africa: Factors associated with HIV infection
Source: PubMed Central journal article supplement (PMC5628807; doi:10.1371/journal.pone.0184775), 2017-10-05
Supplement: pone.0184775.s003.pdf [file pone.0184775.s003.pdf]

**S3 Text. Questionnaire (All Languages) (Pdf)****SCREENING TOOL**

Coupon Number

---

Date of Screening

---

Have you scanned their fingerprint into the system? If so, are they a new participant?  
(PLEASE DO NOT CONTINUE UNTIL THIS HAS BEEN DONE TO AVOID DUPLICATION INTO THE STUDY)

Yes  No

---

---

**SCREENING FOR INCLUSION & EXCLUSION CRITERIA**

Biological Gender (what you were born)

Female  Male  Other

Self-identifies as a SW or self-identifies as working within a SW hotspot and consensually trading in sex for money or goods as her a primary source of income

Yes  No

Working (as a sex worker) in Soweto

Yes  No

Date of Birth

(IF DATE OF BIRTH UNKNOWN, ENTER AGE INTO S12, BELOW)

Age (if DoB unknown)

---

HIV status known or unknown

Known  Unknown

Current victim of human trafficking or sexual exploitation

(ANY INDIVIDUAL WHO REPORTS BEING A CURRENT VICTIM OF HUMAN TRAFFICKING OR EXPLOITATION MUST BE REFERRED TO THE DEPARTMENT OF SOCIAL DEVELOPMENT IMMEDIATELY.)

Yes  No

Are you part of the study team or did you participated in the pilot study for this study?

Yes  No

Do you believe this person is a sex worker

yes, no secondary screening required  yes, only after secondary screening  no, after secondary screening. Please change them to a non sex worker above and do not enroll

SUCCESSFULLY SCREENED! :)Please enroll this person

Participant is NOT ELIGIBLE Please do not enroll this person

If you were to be enrolled into this study, what language would you prefer to do the survey in?

English  Zulu  Sotho

How many female sex workers do you know in Soweto? By 'know' I mean, people you know by name and would greet if you saw them, and they would greet you back

(YOU CAN TAKE YOUR TIME, THINK OF ALL THE FEMALE SEX WORKERS WHO ARE OVER THE AGE OF 18 YEARS AND WHO WORK IN SOWETO. THEY DO NOT HAVE TO WORK HERE EVERY DAY OF THE WEEK, BUT THEY DO NEED TO DO SELL SEX IN SOWETO SOMETIMES.)

Of those female sex workers, about how many are over the age of 18 years?

(THE NUMBER CANNOT EXCEED THE TOTAL NUMBER OF FEMALE SEX WORKERS KNOWN)

Of those female sex workers that you know, how many have you seen over the past month?

(THE NUMBER CANNOT EXCEED THE TOTAL NUMBER OF FEMALE SEX WORKERS KNOWN)

If you think about the the whole of Soweto, how many female sex workers do you estimate work across the whole of Soweto?

(TAKE HER TIME, ASSIST HER TO THINK OF THE WHOLE OF SOWETO, ALL 40 SUBURBS)

What are the main areas that you do business (sell sex) in Soweto?

- Braamfischerville
  - Tshiawelo
  - Devland
  - Diepkloof
  - Dlamini
  - Dobsonville
  - Doornkop
  - Dube
  - Embuzini
  - Emdeni
  - Freedom Park
  - Greenvillage
  - Jabavu
  - Jabulani
  - Klipspruit
  - Kliptown
  - Lakeside
  - Mapetla
  - Meadowlands
  - Mmesi Park
  - Mofolo
  - Molapo
  - Moletsane
  - Moroka
  - Mzimhlope
  - Naledi
  - Noordgesig
  - Nomzamo Park
  - Nancefield
  - Orlando
  - Phefeni
  - Phiri
  - Pimville
  - Power Park
  - Protea Glen
  - Protea North
  - Protea South
  - Senaorane
  - Tladi
  - Zola
  - Zondi
  - White City
  - Other Soweto
  - Other outside Soweto
- 

Now think about the main area that you work in in Soweto, how many female sex workers do you think work in just that part of the township, in that suburb (so not just the tavern or hostel)?

# Preliminary

---

---

## PRELIMINARY INFORMATION

Consented to both questionnaire and HIV tests

- Refused to Participate in Questionnaire and HIV Tests    Agreed to Both Survey and HIV Tests  
 Has Already Participated in The Study

Date and time of interview

\_\_\_\_\_

Have you ever been to the SSWP or met with one of our peer educators prior to today?

- No I have not met a PE or been to The Wellness Center  
 I have met a Peer Educator On Outreach  
 I have been to The Wellness Center  
 I have come to an SSWP creative space

What sex worker programmes in and around Soweto, or anywhere else in South Africa have you heard about?  
(PLEASE SELECT ALL THAT APPLY)

- No    Sswp    Sweat    Sisonke    Esselen Street/Wrhi    Red Umbrella Project  
 Another Sw Project

First name

\_\_\_\_\_

Surname

\_\_\_\_\_

Primary contact phone number

\_\_\_\_\_

# Demographic

---

---

## QUESTIONNAIRE

Age

---

What suburb do you live in? By live in I mean, where do you normally sleep, for at least 3 nights/days of the week?

- Braamfischerville    Tshiwelo    Devland    Diepkloof    Dlamini    Dobsonville  
 Doornkop    Dube    Embuzini    Emdeni    Freedom Park    Greenvillage  
 Jabavu    Jabulani    Klipspruit    Kliptown    Lakeside    Mapetla    Meadowlands  
 Mmesi Park    Mofolo    Molapo    Moletsane    Moroka    Mzimbhlope    Naledi  
 Noordgesig    Nomzamo Park    Nancefield    Orlando    Phefeni    Phiri    Pimville  
 Power Park    Protea Glen    Protea North    Protea South    Senaorane    Tladi  
 Zola    Zondi    White City    Other Soweto    Other outside Soweto

Are you sexually attracted to women or men or both or don't know

- Women    Men    Both men and women    Don't know

What racial group do you belong to?

- Black African    Coloured    White    Indian/Asian    Other

Where were you born?

- Gauteng    Kwazulu Natal    Western Cape    Eastern Cape    Norther Cape  
 Freestate    Mpumalanga    Limpopo    Zimbabwe    Mozambique    Malawi  
 Botswana    Uganda    Other

When did you arrive in South Africa?

\_\_\_\_\_

When did you come to live in Soweto?

\_\_\_\_\_

(IF BORN IN SOWETO, ENTER 01-01-[YEAR OF BIRTH])

What is your home language?

- Zulu    Ndebele    Xhosa    Northern Sotho    Sesotho    Setswana    Siswati  
 Tshivenda    Xitsonga    English    Afrikaans    Other

Did you ever go to school? If so, what is the highest grade you have ever successfully achieved (passed)?

- No Schooling    Primary School Incomplete    Primary School Completed    High School Incomplete  
 High School Completed    Post School Qualification

Are you currently studying?

- No    Yes

Have either of your parents died?

(IF MOTHER, ANSWER A12IF NEITHER OR DO NOT KNOW SKIP TO A13)

- Neither    Mother    Father    Mother and Father    I Do Not Know

How old were you when your mother died?

\_\_\_\_\_

How many living children do you have?

\_\_\_\_\_

(IF NO CHILDREN, PLEASE ENTER IN 0. IF STILL PREGNANT WITH FIRST CHILD, PLEASE ENTER IN 0IF NO CHILDREN, SKIP TO A16)

Are any of your children under the age of 12?

- None Of Them    1 Child Is    2 Children Are    3 Children Are    4 Children Are  
 5 Children Are    All Of Them Are Under 7 Years Of Age

Do any of your children currently live with you?

- No    Yes

How many people including yourself live in your house (the place where you stay)?

\_\_\_\_\_

How many rooms are in the house that you live in?

\_\_\_\_\_

Do the people in your home go without food often, sometimes, seldom or never?

- Often    Sometimes    Seldom    Never

Do the people in your home eat meat often, sometimes, seldom or never?

- Often    Sometimes    Seldom    Never

If a person in your home became very ill and R100 was needed for the treatment or medicine, would you say that to find the money would be very easy, easy, quite difficult or very difficult?

- Very Easy    Easy    Quite Difficult    Very Difficult

In the past month, how many people have relied on your earnings/money for food, shelter or school fees?

(PROBE ABOUT CHILDREN, PARENTS, SIBLINGS, PARTNER, FLAT MATES OR FRIENDS OR OTHER FAMILY REQUIRING SUPPORT. HELP THEM COUNT BY SHOWING FINGERS!)

---

---

**Do you have any other activities other than sex work to support your livelihood?**

Selling sex is my primary source of income

- No    yes

I am employed by a company or person

- No    yes

I am unemployed

- No    yes

I receive a government grant such as a pension or child support grant

- No    yes

I sell/trade goods such as vegetables or clothes to earn money

- No    yes

In the last week, where do you normally sleep?

- Flat    Hostel    Tavern Back Room    At Home With My Family    A Private House With Other Sex Workers  
 A Private House With No Other Sex Workers Live With Me    A Brothel    Abandoned Building  
 On The Streets/Nowhere in Particular, Constantly On The Move    Hotel    Other

What is the main reason that you became a sex worker? Select the one which was most important to you at the time of your decision to become a sex worker

- Chosen Work    No Other Jobs Available    to Pay For Drugs/Alcohol    I Needed Money  
 Forced Into Sex Work    Friend/Relative Who Was A Sex Worker Showed Me    To be independent  
 Other reason

How many years have you been a sex worker for?

\_\_\_\_\_

(ROUND TO THE NEAREST YEAR)

How old were you when you first sold sex?

\_\_\_\_\_

Under what circumstances did you first sell sex?

- No Income to Buy Food Or For Shelter/Kicked Out    Nowhere to stay, have nothing From Being Deserted, Becoming An Orphan Or A Widow/Divorcee    to Add Onto The Family Income    to Pay For Medical Costs in The Family Or For Self  
 to Earn Fast Money Or Meet Personal Expenses    Tricked Into Going to A Brothel  
 Forced By Family    Forced By Boyfriend    Had to Pay Back Someone Through Sexual Favours  
 Forced By Stranger    Forced By friend(s)    Teenage Pregnancy    Other

Where do you normally pick up your mcimbi?  
(PLEASE SELECT ALL THAT APPLY)

- Tavern    Taxi Rank    Truck Stop    Prison    Referral    Street    Hostel  
 Hostel Taverns    Internet    Newspaper/Magazine Advertisements    Brothel    Strip/Dance Club  
 Police    Security    Salon(Hair)    Pick-Up (Road/Street Corner)    Mine    Hotel  
 Other



O dula Motsetoropong ofe? Ka ho dula re bolela moo o robalang teng ka tlwaelo, bonyane masiu/matsatsi a 3 a beke?

- Braamfischerville  Tshiwelo  Devland  Diepkloof  Dlamini  Dobsonville  
 Doornkop  Dube  Embuzini  Emdeni  Freedom Park  Greenvillage  
 Jabavu  Jabulani  Klipspruit  Kliptown  Lakeside  Mapetla  Meadowlands  
 Mmesa Park  Mofolo  Molapo  Moletsane  Moroka  Mzimhlope  Naledi  
 Noordgesig  Nomzamo Park  Nancefield  Orlando  Phefeni  Phiri  Pimville  
 Power Park  Protea Glen  Protea North  Protea South  Senoane  Tladi  
 Zola  Zondi  White City  Other Soweto  Other outside Soweto

Ana o kgahlwa ke ho etsa thobalano le basadi kapa banna kapa bobedi ba bona kapa ha o tsebe?

- Basadi  Banna  Banna le basadi ka bobedi  Ha o tsebe

O wa morabe ofe?

- Mothomotsho  Lekhalate  Lekgowa  Moindia/Moeshia  E mong

O hlahetse hokae?

- Gauteng  Kwazulu Natal  Western Cape  Eastern Cape  Northern Cape  
 Free State  Mpumalanga  Limpopo  Zimbabwe  Mozambique  Malawi  
 Botswana  Uganda  Other

O fihlile neng Aforika Borwa?

\_\_\_\_\_

O tlile neng ho tla dula Soweto?

\_\_\_\_\_

(IF BORN IN SOWETO, ENTER 01-01-[YEAR OF BIRTH])

Puo ya hao ya lapeng ke efe?

- Zulu  Ndebele  Xhosa  Northern Sotho  Sesotho  Setswana  Siswati  
 Tshivenda  Xitsonga  English  Afrikaans  Other

Na o kile wa ya sekolong? Ebang ho le jwalo, o phasitse mophato ofe o ka hodimodimo?

- Ha o a kena sekolo  Ha o a qeta Sekolo sa Poraemari  O qetile Sekolo sa Poraemari  
 Ha o a qeta Sekolo se Phahameng  O qetile Sekolo se Phahameng  O na le Lengolo la Thuto la Ka mora Sekolo

Na ha jwale o a ithuta?

- Tjhe  E

Na o na le motswadi ya hlokaletseng?

(IF MOTHER, ANSWER A12IF NEITHER OR DO NOT KNOW SKIP TO A13)

- Ha a yo  Mme  Ntate  Mme le Ntate  Ha ke tsebe

O ne o le dilemo tse kae ha mme wa hao a hloka hala?

\_\_\_\_\_

O na le bana ba bakae ba phelang?

\_\_\_\_\_

(F33)

Na o na le ngwana ofe kapa ofe wa dilemo tse ka tlase ho tse 12?

- Ha ho le a mong wa bona    Ngwana a le 1    Bana ba babedi 2    Bana ba babedi 3  
 Bana ba babedi 4    Bana ba babedi 5    Kaofela ha bona ba ka tlase ho dilemo tse 7

Na ho na le ngwana ofe kapa ofe wa hao eo ha jwale a dulang le wena?

- Tjhe    E

Batho ba dulang ka tlung ya hao, ho kenyeletsa le wena, ba bakae? (moo o dulang)

\_\_\_\_\_

Ntlo eo o dulang ho yona e na le diphaposi tse kae?

\_\_\_\_\_

Na o ka bolela hore batho ba dulang ka tlung ya hao ba ye ba hloke dijo ha ngata, ka dinako tse ding, ha se ha ngata kapa ha ba ke ba hloke dijo?

- Ha ngata    Ka dinako tse ding    Ha se ha ngata    Ha ba ke ba hloke

Na o ka bolela hore batho ba dulang ka tlung ya hao ba ye ba je nama ha ngata, ka dinako tse ding, ha se ha ngata kapa ha ba ke ba je nama?

- Ha ngata    Ka dinako tse ding    Ha se ha ngata    Ha ba ke ba hloke

Haeba ho na le motho ka tlung ya hao ya kulang mme ho hlokeha R100 ya kalafo kapa moriana, na o ka bolela hore ho ka ba bobebe haholo, bobebe, boima kapa boima haholo ho fumana tjhelete?

- Bobebe haholo    Bobebe    Boima    Boima haholo

Kgweding e fetileng, batho ba tshepetseng moputsong/tjheleteng ya hao bakeng sa dijo, bodulo kapa ditefello tsa sekolo ba ba kae?

(PROBE ABOUT CHILDREN, PARENTS, SIBLINGS, PARTNER, FLAT MATES OR FRIENDS OR OTHER FAMILY REQUIRING SUPPORT. HELP THEM COUNT BY SHOWING FINGERS!)

---



---

**Do you have any other activities other than sex work to support your livelihood?**

Horekisa mmele keyona feela kgwebo enkenyetsang tjhelete

- Tjhe    e

Ke hirilwe ke khamphani kapa motho

- Tjhe    e

Ha ke sebetse

- Tjhe    e

Ke amohela kerante ya mmuso e jwalo ka phenshene kapa kerante ya ho hodisa ngwana

- Tjhe    e

Ke rekisa/hweba ka dintho tse kang meroho kapa diaparo ho fumana tjhelete

Tjhe  e

Bekeng e sa tswa feta, o tlwaetse ho robala kae?

Hostele  Thaveneng Phaposing e ka Morao  Lapeng le Ba lelapa la Heso  Ntlong ya Poraevete le diSex Worker tse Ding  Ntlong ya Poraevete e Se Nang diSex Worker tse Ding tse Dulang le Nna  
 Brothele  Moahong o Sa Hlokomelweng  Diterateng/Ha ho moo ke dulang, Ke dula ke Tsamaya  
 Hoteleng  Sebakeng se Seng

Lebaka le leholo le entseng hore o be sex worker ke lefe? Kgetha leo e neng e le la bohlokwa ho wena ka nako eo o nkang qeto ya ho ba sex worker

Ke Mosebetsi oo ke o Kgethileng  Ha ho na Mosebetsi e Meng e Fumanehang  ho Lefella Dithethefatsi/Jwala  Ke ne ke Hloka Tjhelete  Ke Qobellehile ho etsa Sex Work  Motswalle/E mong wa leloko eo e neng e le Sex Worker o Mpontshitse  Ho re ke e emele  Lebaka le Leng

O na le dilemo tse kae o le sex worker?

\_\_\_\_\_  
 (ROUND TO THE NEAREST YEAR)

O ne o le dilemo tse kae ha o qala ho rekisa thobalano?

\_\_\_\_\_

O qadile ho rekisa thobalano ka mabaka afe?

Ha ho na tjhelete ya ho reka Dijo kapa ya Bodulo/Lelekilwe  Ha ho na Tshireletso E bonahalang/ya Nnete ya Ho lahlwa, Ho ba Kgutsana kapa Mohlolohadi/Motho ya Hladileng  ho Eketsa Moputsong wa Lelapa  
 Ho Lefella Ditjeho tsa Bongaka tsa Lelapa kapa tsa Ka  Ho Fumana Tjhelete e Fumanehang ka Potlako kapa Ho Lefella Ditshenyehelo  Qhekanyeditswe ho ya Brotheleng  Qobelletswe ke ba Lelapa  
 Qobelletswe ke Mohlankana  Ke ne ke tlamehile ho lefa Motho e Mong ka ho etsa Thobalano  
 Qobelletswe ke Motho eo ke sa mo tsebeng  Qobelletswe ke ba bang ba Lelapa  Ho ba Mmeleng ha Batjha  E nngwe

Hangata mcimbi wa hao o o lata ho kae?

(PLEASE SELECT ALL THAT APPLY)

Thaveneng  Renkeng ya Ditekesi  Setopong sa Dilori  Tjhankaneng  Rometswe  
 Seterateng  Hostele  Dithaveneng tsa Hostele  Inthaneteng  Dipapatsong tsa Koranta/Mekesine  Brothel  Tlelapong ya Metantsho ya batho ba Hlobolang ha ba Tantsha  
 Sepoleseng  Tshireletsong  Salunung (Moriri)  Moo ho engwang teng (Hukung ya Mmila/Seterata)  Maeneng  E nngwe

Uhlala kweliphi idolobhana? Ngokuhlala, ngisho ukuthi yikuphi lapho ulala khona ngokuvamile, okungenani ubusuku/izinsuku ezi-3 ngeviki.

- Braamfischerville    Tshiawelo    Devland    Diepkloof    Dlamini    Dobsonville  
 Doornkop    Dube    Embuzini    Emdeni    Freedom Park    Greenvillage  
 Jabavu    Jabulani    Klipspruit    Kliptown    Lakeside    Mapetla    Meadowlands  
 Mmesi Park    Mofolo    Molapo    Moletsane    Moroka    Mzimhlope    Naledi  
 Noordgesig    Nomzamo Park    Nancefield    Orlando    Phefeni    Phiri    Pimville  
 Power Park    Protea Glen    Protea North    Protea South    Senaoane    Tladi  
 Zola    Zondi    White City    Other Soweto    Other outside Soweto

Ingabe uthanda ukwenza ucansi nabantu besifazane noma namadoda noma kokubili noma awazi

- Abesifazane    Amadoda    Kokubili amadoda nabesifazane    Angazi

Ungowaluphi uhlanga?

- Um-Afrika Omnyama    Umkhaladi    Umlungu    UmNdiya/Um-Eshiya    Okunye

Wazalelwaphi?

- Gauteng    KwaZulu Natali    Ntshonalanga Kapa    Mpumalanga Kapa    Nyakatho Kapa  
 Freyistata    Mpumalanga    Limpopo    Zimbabwe    Mozambique    Malawi  
 Botswana    Uganda    Elinye

Wafika nini eNingizimu Afrika?

\_\_\_\_\_

Wafika nini ukuzohlala eSoweto?

\_\_\_\_\_

(IF BORN IN SOWETO, ENTER 01-01-[YEAR OF BIRTH])

Yiluphi ulimi lwakho lwasekhaya?

- isiZulu    isiNdebele    isiXhosa    IsiSuthu SaseNyakatho    isiSuthu    isiTswana  
 isiSwati    isiVenda    isiTsonga    isiNgisi    isiBhunu    Olunye

Wake wasifunda isikole? Uma kunjalo, yiliphi ibanga eliphezulu kakhulu owaliqeda ngempumelelo (owaliphasa)?

- Asikho Isikole    Asiqedwanga Isikole Samabanga Aphansi    Siqediwe Isikole Samabanga Aphansi  
 Asiqedwanga Isikole Samabanga Aphezulu    Isiqediwe Isikole Samabanga Aphezulu  
 Iziqu Zangemuva Kwesikole

Uyafunda yini njengamanje?

- Cha    Yebo

Ukhona yini kubazali bakho owashona?

(IF MOTHER, ANSWER A12IF NEITHER OR DO NOT KNOW SKIP TO A13)

- Akekho    Umama    Ubaba    Umama noBaba    Angazi

Wawuneminyaka emingaki ngesikhathi umama wakho eshona?

\_\_\_\_\_

Unezingane ezingaki eziphilayo?

\_\_\_\_\_

(F33)

Ikhona yini ezinganeni zakho engaphansi kweminyaka eyi-12 ubudala?

- Akekho Kubo  ingane1  Izingane 2  Izingane 3  Izingane 4  Izingane 5  
 Zonke Kuzo Zingaphansi Kweminyaka eyi-7 Ubudala

Ikhona yini ezinganeni zakho ehlala nawe njengamanje?

- Cha  Yebo

Bangaki abantu kubalwa nawe abahlala endlini yakho (indawo lapho ohlala khona)?

\_\_\_\_\_

Mangaki amagumbi endlini ohlala kuyo?

Ungasho yini ukuthi abantu abasemzini wakho kaningi, ngezinye izikhathi, akuvamile noma akaze bahlale bengadlile?

- Kaningi  Ngezinye izikhathi  Akuvamile  Neze nhlobo

Ungasho yini ukuthi abantu abasemzini wakho kaningi, ngezinye izikhathi, akuvamile noma abayidli nhlobo inyama?

- Kaningi  Ngezinye izikhathi  Akuvamile  Neze nhlobo

Uma umuntu osemzini wakho egula kakhulu futhi kudingeka u-R100 ukumelapha noma umuthi, ungasho yini ukuthi kuzoba lula kakhulu, kuzoba lula, kuzoba nzima noma kuzoba nzima kakhulu ukuthola imali?

- Kulula Kakhulu  Kulula  Kunzima Impela  Kunzima Kakhulu

Ngenyanga edlule, bangaki abantu abebethembele emalini yakho oyiholayo/emalini yokudla, indawo yokukhosela noma izimali zesikole?

(PROBE ABOUT CHILDREN, PARENTS, SIBLINGS, PARTNER, FLAT MATES OR FRIENDS OR OTHER FAMILY REQUIRING SUPPORT. HELP THEM COUNT BY SHOWING FINGERS!)

---



---

**Do you have any other activities other than sex work to support your livelihood?**

Ukudayisa umzimba iyona ndlela engingenisela imali

- Cha  yebo

Ngiqashwe yinkampani noma wumuntu

- Cha  yebo

Angisebenzi

- Cha  yebo

Ngithola isibonelelo sikahulumeni esifana nempesheni noma isibonelelo sokondla ingane

- Cha  yebo

Ngithengisa /ngihweba ngezimpahla ezifana nemifino noma izimpahla zokugqoka ukuthi ngithole imali

- Cha  yebo

Esontweni eledlule, ulala kuphi ngokuvamile?

- Ehostele    Igumbi Elingemuva Ethaveni    Ekhaya Nomndeni Wami    Indlu Engasese Namanye  
 Ama-Sex Worker    Indlu Engasese Akukho Amanye Ama-Seex Worker Ahlala Nami    Indawo Esebenzela  
 Ama-Sex Worker    Ibhilidi Elilaxaziwe    Emigwaqeni/Akukho Ndawo Thizeni, Njalo Uyahamba  
 Ihotela    Okunye

Yisiphi isizathu esikhulu esikwenze ukuthi ube yi-sex worker? Khetha lokho okwakubaluleke kunakho konke ngaleso sikhathi ngesinqumo sakho sokuba yi-sex worker

- Umsebenzi Engiwukhethile    Awukho Omunye Umsebenzi Okhona    Ukukhokhela  
 Izidakamizwa/Utshwala    I Bekudingeka Imali    Uphoqeelwe Emsebenzini Wocansi  
 Umngane/Isihlobo Esasiyi-Sex Worker Sangikhombisa    Ukuthi ngizimele    Esinye Isizathu

Mingaki iminyaka uyi-sex worker?

\_\_\_\_\_

(ROUND TO THE NEAREST YEAR)

Wawungakanani lapho uqala ukuthengisa ucansi?

\_\_\_\_\_

Waluthengisa ngaphansi kwaziphi izimo ucansi okokuqala?

- Ayikho Imali Engenayo Yokuthenga Ukudla Noma Indawo Yokuhlala/Ukhishiwe    Akukho Ukuvikeleka  
 Komzimba Ekushiyweni, Ube Yintandane Noma Umfelokazi/Udivosile    Ukwengeza Emalini Yomndeni  
 Engenayo    Yokukhokha Izindleko Zokwelashwa eMndenini noma zakho Uqobo    Ukuthola Imali Esheshayo  
 Noma Ukuhlangabezana Nezindleko Zakho Siqu    Waphicwa Ukuthi Uye Endaweni Yama-Sex Worker  
 Waphoqwa Umndeni    Waphoqwa Yisoka    Kwakufanele Ukhokhele Umuntu Othize Ngamafeyiva  
 Ocansi    Waphoqwa Umuntu Ongamazi    Waphoqwa Ngomunye Umndeni    Ukukhulelwa Kwengane  
 Engena Ebudaleni    Okunye

Uvame ukuwuthatha kuphi umcimbi wakho?

(PLEASE SELECT ALL THAT APPLY)

- Ithaveni    Irenki Yamatekisi    Indawo Yokuma Amathilagi    Ijele    Ukudluliselwa  
 Umgwaqo    Ehostele    Amathaveni Amahostela    Inthanethi    Izikhangisi  
 Zephephandaba/Zephephabhuku    Indawo esetshenziswa ama-sex worker    I-Strip/Dance Club  
 Amaphoyisa    i-Security    iSalon(Izinwele)    Pick-Up (Umgwaqo/Ikhona Lomgwaqo)  
 Imayini    Okunye

## Hiv Knowledge

Have you previously tested for HIV?

- No  Yes

Where was this test done?

- I Can't Remember  SSWP  Zazi Clinic  Local Clinic  Hospital  Other

What was your test result?

(IF NEGATIVE, SKIP TO B6)

- I Do Not Know  Negative  Positive  Indeterminate

Are you on treatment?

(IF NO, SKIP TO B6)

- Never taken  On treatment always  stopped taking treatment

In the past week how many times have you taken your treatment?

- All 7 Days  5-6 Days  3-4 Days  1-2 Days  Not At All

What was the reason that you tested last time?

- Peer Educator encouraged Me  I wasn't Feeling Well  Regular Checkup  Condom Bust  
 Rape/Sexual Assault  Concerned about my own Health  Partner is or was Ill  Partner is HIV  
 Positive  Mcimbi was Ill  Mcimbi is HIV Positive  Family Member has HIV

---

**Please tell me for each of the following, whether you think it is safe, probably safe, unsafe or you do not know.**

Dry kissing

- Safe  Probably Safe  Unsafe  I Don'T Know

Wet kissing/deep kissing

- Safe  Probably Safe  Unsafe  I Don'T Know

Normal sex (vagina) with a condom

- Safe  Probably Safe  Unsafe  I Don'T Know

Anal sex without a condom

- Safe  Probably Safe  Unsafe  I Don'T Know

blow job (oral sex) without a condom

- Safe  Probably Safe  Unsafe  I Don'T Know

---



---

**Please tell me whether you strongly agree, agree, disagree or strongly disagree.**

Sex workers are at high risk of contacting HIV

- Strongly Agree    Agree    Disagree    Strongly Disagree

Non sex workers have a higher risk of getting HIV than sex workers

- Strongly Agree    Agree    Disagree    Strongly Disagree

I do not need to use a condom with my main partner

- Strongly Agree    Agree    Disagree    Strongly Disagree

If I contracted HIV, it could be cured/gotten rid of with medication/treatment from a doctor, traditional healer

- Strongly Agree    Agree    Disagree    Strongly Disagree

Sex workers have less risk of experiencing violence than non sex workers

- Strongly Agree    Agree    Disagree    Strongly Disagree

Experiencing violence increases the risk of getting HIV

- Strongly Agree    Agree    Disagree    Strongly Disagree

Ana o kile wa etsa teko ya HIV nakong e fetileng?

- Tjhe    E

Teko ena e etseditswe ho kae?

- Ha ke hopole    SSWP    Tleleniking ya Zazi    Tleleniking ya Lehae    Sepetlele  
 E nngwe

Sephetho sa teko ya hao e ne e le sefe?

- Ha Ke Tsebe    Nekethifi    Phosethifi    Ha se a Fumaneha

Ana o sebedisa kalafo?

- Never taken    On treatment always    stopped taking treatment

Bekeng e sa tswa feta, o nwele kalafo ya hao makgetlo a makae?

- Matsatsi a 7 Kaofela    Matsatsi a 5-6    Matsatsi a 3-4    Letsatsi le le 1-2    Ho hang

Lebaka la hore o etse teko lekgetlong le fetileng e ne e le lefe?

- Peer Educator e Nkgothaleditse    Ke ne ke sa Ikutlwe Hantle    Ho Hlola ha Ka mehla  
 Khondomo e Phunyhile    Peto/Utlwiswa Bohloko ka Thobalano    Ngongorehile ka Bophelo ba Ka  
 Molekane o a kapa o ne a kula    Molekane o HIV Phosethifi    Mcimbi o ne o sa Phela Hantle  
 Mcimbi o HIV Phosethifi    Setho sa Lelapa se na le HIV



---

**Please tell me for each of the following, whether you think it is safe, probably safe, unsafe or you do not know.**

Ho sunana ho sa sebediseng leleme

- Bolokehile  Ho na le Kgonahalo ya Ho bolokeha  Ha ho a Bolokeha  Ha Ke Tsebe

Ho sunana ha ho sebedisa leleme

- Bolokehile  Ho na le Kgonahalo ya Ho bolokeha  Ha ho a Bolokeha  Ha Ke Tsebe

Ho robalana ha ho kenya setho sa bonna ka kukung ka khondomo

- Bolokehile  Ho na le Kgonahalo ya Ho bolokeha  Ha ho a Bolokeha  Ha Ke Tsebe

Ho robalana ha ho kenya setho sa bonna ka maraong ntle lekhondomo

- Bolokehile  Ho na le Kgonahalo ya Ho bolokeha  Ha ho a Bolokeha  Ha Ke Tsebe

Ho nyeka ditho tsa bonna le bosadi ntle le khondomo

- Bolokehile  Ho na le Kgonahalo ya Ho bolokeha  Ha ho a Bolokeha  Ha Ke Tsebe

---

**Please tell me whether you strongly agree, agree, disagree or strongly disagree.**

Disex worker di na le kotsi e nyane ya ho ba le HIV ho feta bao e seng disex worker

- Ke Dumela Ke Tiile  Ke a Dumela  Ke a Hana  Ke Hana ke Tiile

Motho eo eleng non sex worker ona le kotsi e kgolo ya ho ba le HIV ho feta sex worker

- Ke Dumela Ke Tiile  Ke a Dumela  Ke a Hana  Ke Hana ke Tiile

Ha ke hloke ho sebedisa khondomo le regte wa ka (molekane wa bohlokwa)

- Ke Dumela Ke Tiile  Ke a Dumela  Ke a Hana  Ke Hana ke Tiile

Ha ke tshwaetswa ke HIV, e ka alafuwa/fediswa ka meriana/kalafo e tswang ngakeng, ngakeng ya setho

- Ke Dumela Ke Tiile  Ke a Dumela  Ke a Hana  Ke Hana ke Tiile

Disex worker di na le kotsi e nyane ya ho ba diketsong tsa dikgoka ho feta bao e seng disex worker

- Ke Dumela Ke Tiile  Ke a Dumela  Ke a Hana  Ke Hana ke Tiile

Ho ba diketsong tsa dikgoka ho eketsa kotsi ya ho ba le HIV

- Ke Dumela Ke Tiile  Ke a Dumela  Ke a Hana  Ke Hana ke Tiile

Uke wahlola i-HIV esikhathini esedlule?

(IF HAS NO, SKIP TO B7)

- Cha  Yebo

Kwenziwa kuphi lokhu kuhlolwa?

- Angikhumbuli  I-SSWP  I-Zazi Clinic  Umtholampilo Wasekhaya  Isibhedlela  
 Okunye

Wathini umphumela wakho?  
 (IF NEGATIVE, SKIP TO B6)

- Angazi  Negethivu  Phozethivu  Akwaziwa

Usebenzisa umuthi wokwelashwa?  
 (IF NO, SKIP TO B6)

- Never taken  On treatment always  stopped taking treatment

Ngesonto eledlule uwuthathe izikhathi ezingaki umuthi wakho wokwelashwa?

- Zonke Izinsuku eziwu-7  5-6 Izinsuku  3-4 Izinsuku  1-2 Izinsuku  Lutho Nhlobo

Kwakuyini isizathu sokuthi uhlolwe ngesikhathi esedlule?

- Umfundisi Onguntanga wangikhuthaza  Ngangingaphathekile Kahle  Ukuhlolwa Okuvamile  
 Ukuqhuma Kwekhondomu  Ukudlwengula/Ukuhlaselwa Ngokocansi  Ngikhathazekile ngeMpilo yami uqobo  
 Umlingani uyagula noma wayegula  Umlingani une-HIV  UMcimbi wawugula  
 UMcimbi une-HIV  Ilungu Lomndeni Line-HIV

---

**Please tell me for each of the following, whether you think it is safe, probably safe, unsafe or you do not know.**

Ukuqabula ungafaki ulimi emlonyeni

- Kuphephile  Mhlawumbe Kuphephile  Akuphephile  Angazi

Ukuqabula ufake ulimi emlonyeni

- Kuphephile  Mhlawumbe Kuphephile  Akuphephile  Angazi

Ucansi esithweni somuntu wesifazane ngekhondomu

- Kuphephile  Mhlawumbe Kuphephile  Akuphephile  Angazi

Ucansi endunu ngaphandle kwe khondomu

- Kuphephile  Mhlawumbe Kuphephile  Akuphephile  Angazi

Ucansi ngomlomo ngaphandle kwekhondomu

- Kuphephile  Mhlawumbe Kuphephile  Akuphephile  Angazi

---

**Please tell me whether you strongly agree, agree, disagree or strongly disagree.**

Ama-sex workers asengozini enkulu yokuthola i-HIV

- Ngiyavuma Kakhulu  Ngiyavuma  Angivumi  Angivumi Kakhulu

Umuntu ongasiyona isex worker usengozini enkulu yokuthola iHIV kunoyi sex worker

Ngiyavuma Kakhulu  Ngiyavuma  Angivumi  Angivumi Kakhulu

Asikho isidingo sokuthi ngisebenzise ikhondomu nomaqondana wami (umlingani wangempela)

Ngiyavuma Kakhulu  Ngiyavuma  Angivumi  Angivumi Kakhulu

Uma ngithola i-HIV, ingelapheka/ingapheliswa ngomuthi/ngokwelashwa udokotela, inyanga yesintu

Ngiyavuma Kakhulu  Ngiyavuma  Angivumi  Angivumi Kakhulu

Amasex worker asengozini encane yokuhlangabezana nodlame kunalabo abangewona ama-sex worker

Ngiyavuma Kakhulu  Ngiyavuma  Angivumi  Angivumi Kakhulu

Ukuhlangabezana nodlame kwandisa ingozi yokuthola i-HIV

Ngiyavuma Kakhulu  Ngiyavuma  Angivumi  Angivumi Kakhulu

# Childhood

---

---

**Please think back to your childhood and answer the following statements with never, sometimes, often or very often**

I did not have enough to eat

- Never  Sometimes  Often  Very Often

I lived in different households at different times

- Never  Sometimes  Often  Very Often

I saw or heard by mother beaten by her husband or boyfriend

- Never  Sometimes  Often  Very Often

I was told I was lazy or stupid or ugly by someone in my family

- Never  Sometimes  Often  Very Often

Someone touched my thighs, buttocks, breasts or genitals when I did not want him to or made me touch his private parts when I did not want to

- Never  Sometimes  Often  Very Often

I was insulted or humiliated by someone in my family in front of other people

- Never  Sometimes  Often  Very Often

I was beaten at home with a belt or stick or whip or something else which was hard

- Never  Sometimes  Often  Very Often

I had sex with a man who was more than 5 years older than me

- Never  Sometimes  Often  Very Often

One or both of my parents were too drunk to take care of me

- Never  Sometimes  Often  Very Often

I was beaten so hard at home that it left a mark or bruise

- Never  Sometimes  Often  Very Often

I spent time outside the home and none of the adults at home knew where I was

- Never  Sometimes  Often  Very Often

I had sex with someone who was not my boyfriend because I was threatennd or frightenned or forced

- Never  Sometimes  Often  Very Often

Did you attend any kind of initiation school or go to the bush or mountain?  
(IF NO, SKIP TO D1)

- No  Yes

At this ceremony, did you experience any of the following?

(PLEASE SELECT ALL THAT APPLY IF SELECTED LABIAL STRETCHING, ASK QUESTIONS C15)

- I drank Beer/Spirits     I was given drugs     Taught about Pregnancy and Birthing     Taught sex education  
 How to please a husband     How to keep secrets and not talk about problems  
 Given a new name     Malebe (Labia) or Clitoris was stretched or cut     Touched in a sexual way by someone from initiation school  
 Hurt sexually by somebody at the school     Forced to have sex

You have selected that your labia or clitoris was stretched or cut. Please tell me if you experienced any of the following while this was done or afterwards (related to this)

(PLEASE SELECT ALL THAT APPLY.)

- No Pain Or Discomfort     It Was Very Painful     Some Bleeding From My Vagina (Not Relating to A Monthly Period)  
 Urinating Was Painful     I Tried Not to Urinate So That It Did Not Hurt  
 My Vagina/Lips Became Infected     My Vagina/Lips Were Swollen     A Girl (Other Than Myself) Became Very Ill On Camp  
 A Girl Died On The Camp

How old were you when this happened?

- 0-2 years     3-7 years     7-12 years     13-18 years     >19 years

---

**Please think back to your childhood and answer the following statements with never, sometimes, often or very often**

Ke ne ke sa ja dijo tse lekaneng

- Ho hang     Ka dinako tse ding     Ha ngata     Kgafetsa

Ke dutse malapeng a fapaneng ka dinako tse fapaneng

- Ho hang     Ka dinako tse ding     Ha ngata     Kgafetsa

Ke bone kapa ke utlwetse hore mme wa ka o ne a otlwa ke monna kapa mohlankana wa hae

- Ho hang     Ka dinako tse ding     Ha ngata     Kgafetsa

E mong wa ba lelapa la heso o mpoelletse hore ke botswa kapa setlatla kapa ke mobe

- Ho hang     Ka dinako tse ding     Ha ngata     Kgafetsa

Ho na le motho ya phollotseng dirope, marao, matswele kapa bokapele ba ka ke sa batle kapa a etsa hore ke tshware ditho tsa hae ke sa batle

- Ho hang     Ka dinako tse ding     Ha ngata     Kgafetsa

Ke ile ka rohakwa kapa ka swabiswa ke e mong wa ba lelapa la heso mahlong a batho ba bang

- Ho hang     Ka dinako tse ding     Ha ngata     Kgafetsa

Lapeng ke ile ka shapuwa ka lebanta kapa thupa kapa sephadi kapa ho hong ho neng ho le thata

- Ho hang     Ka dinako tse ding     Ha ngata     Kgafetsa

Ke entse thobalanong le monna wa dilemo tse fetang tsa ka ka tse ka hodimo ho tse 5

- Ho hang     Ka dinako tse ding     Ha ngata     Kgafetsa

Motswadi wa ka a le mong kapa bobedi ba bona ba ne ba tahwa haholo ho ka ntlhokomela

- Ho hang  Ka dinako tse ding  Ha ngata  Kgafetsa

Lapeng ke ile ka shapuwa haholo hoo ho setseng mabadi kapa bokgubedu

- Ho hang  Ka dinako tse ding  Ha ngata  Kgafetsa

Ke qetile nako ka ntle le lehae mme ha ho motswadi ya neng a tseba hore ke hokae

- Ho hang  Ka dinako tse ding  Ha ngata  Kgafetsa

Ke entse thobalano le motho eo e neng e se mohlankana wa ka hobane ke tshoseditswe kapa ke tshositswe kapa ke qebelletswa

- Ho hang  Ka dinako tse ding  Ha ngata  Kgafetsa

Na o ile mofuteng ofe kapa ofe wa lebollo kapa ho ya thabeng?

- Tjhe  E

Moketeng ona, na o ile wa etsahallwa ke efe kapa efe ya tse latelang?

(PLEASE SELECT ALL THAT APPLY IF SELECTED LABIAL STRETCHING, ASK QUESTIONS C15)

- Ke nwele Biya/Dipiriti  Ke fuwe dithethefatsi  Rutilwe ka Boimana le Ho beleha  
 Rutilwe thuto ya thobalano  Hore monna o kgotsofatswa jwang  Hore diphiri di bolokwa jwang le ho se bue ka mathata  Fuwe lebitso le letjha  Malebe (Labia) kapa Clitoris e sarollotswe kapa ya kgaolwa  
 Phollotswe ke motho e mong ka tsela e sa amohelehang lebolong  Utlwisitswe bohloko ka thobalano ke motho e mong lebolong  Qobelletswe ho etsa thobalano

O kgethile hore labia kapa clitoris ya hao e sarollotswe kapa e kgaotswe. Ke kopa hore o mpoelle hore na o etsahalletswe ke efe kapa efe ya tse latelang ha sena se etswa kapa ka mora moo (se amanang le sena)  
 (PLEASE SELECT ALL THAT APPLY.)

- Ho ne ho se bohloko  Ho ne ho le bohloko haholo  Kuku ya kae ne e tswa Madi a Mangata (E seng ho amanang le Ho ya Kgwedding)  Ho ntsha metsi ho ne ho le Bohloko  Ke Lekile Ho se Ntsho metsi Hore Ho se be Bohloko  Kuku ya ka /Malebe a Tshwaeditswe  Kuku ya ka /Malebe a ne a Ruruhile  
 Ngwanana e mong (Ntle le nna) o ile a Kula Haholo Kampong  Ngwanana e mong o ile a Hlokahala Kampong

One onale dilemo tsekae ha ketsahalo ena ehohlahella

- 0-2 years  3-7 years  7-12 years  13-18 years  >19 years

---

**Please think back to your childhood and answer the following statements with never, sometimes, often or very often**

Bengingenakho okokudla okwanele

- Neze nhlobo  Ngezinye Izikhathi  Kangingi  Kangingi Kakhulu

Ngihlala emizini ehlukene ngezikhathi ezahlukene

- Neze nhlobo  Ngezinye Izikhathi  Kangingi  Kangingi Kakhulu

Ngabona noma ngezwa umama eshaywa ngumyeni wakhe noma yisoka

- Neze nhlobo  Ngezinye Izikhathi  Kangingi  Kangingi Kakhulu

Ngatshelwa ngomunye umuntu womndeni wami ukuthi ngiyivila, noma ngiyisilima noma ngimubi

- Neze nhlobo  Ngezinye Izikhathi  Kangingi  Kangingi Kakhulu

Omunye umuntu wangithinta amathanga, izingqe, amabele noma izitho zangasese ngingathandi ukuthi angithinte noma wangenza ukuthi ngithinte izitho zakhe zangasese ngingafuni

- Neze nhlobo  Ngezinye Izikhathi  Kangingi  Kangingi Kakhulu

Ngathukwa noma ngahlanjalazwa ngomunye umuntu emndenini wami phambi kwabanye abantu

- Neze nhlobo  Ngezinye Izikhathi  Kangingi  Kangingi Kakhulu

Ekhaya bangishaya ngebhande noma ngenduku noma ngesiswebhu noma ngenye into eyayiqinile

- Neze nhlobo  Ngezinye Izikhathi  Kangingi  Kangingi Kakhulu

Ngaya ocansini nendoda eyayindala kunami ngeminyaka emi-5

- Neze nhlobo  Ngezinye Izikhathi  Kangingi  Kangingi Kakhulu

Oyedwa noma bobabili abazali bami babedakwe kakhulu ukuthi babenganginakekela

- Neze nhlobo  Ngezinye Izikhathi  Kangingi  Kangingi Kakhulu

Ngashaywa kakhulu ekhaya kwaze kwasala umvimbi noma umhuzuko

- Neze nhlobo  Ngezinye Izikhathi  Kangingi  Kangingi Kakhulu

Ngachitha isikhathi ngaphandle kwasekhaya futhi akekho owaziyo ekhaya ukuthi ngangikuphi

- Neze nhlobo  Ngezinye Izikhathi  Kangingi  Kangingi Kakhulu

Ngaya ocansini nomuntu owayengesilona isoka lami ngoba ngangesatshiswa noma ngangesaba noma ngangiphoqwa

- Neze nhlobo  Ngezinye Izikhathi  Kangingi  Kangingi Kakhulu

Kukhona yini uhlobo lwesikole sokuthonjiswa owaya kulo noma waya ehlathini noma entabeni?

- Cha  Yebo

Kulo mgubho, wahlangabezana yini nanoma yikuphi kokulandelayo?  
(PLEASE SELECT ALL THAT APPLY)

- Ngaphuza Ubhiya/Ugologo  Nganikwa izidakamziwa  Ngafundiswa Ngokukhulelwa Nokubeletha  
 Ngafundiswa Ngemfundo Yocansi  Umthokozisa kanjani Umyeni  Uzigcina kanjani izimfihlo futhi  
 ngingakhulumi ngezinkinga  Unikwe igama elisha  Amalebe (Labia) noma Umsunu (Clitoris) wadonselwa  
 ngaphandle noma wasikwa  Wantintwa ngendlela ephathelene nocansi ngumuntu ovela esikoleni  
 sokuthombisa  Ngalinyazwa ngokocansi ngomunye umuntu esikoleni  Ngaphoqwa ukwenza ucansi

Ukhethe ukuthi amalebe akho noma umsunu wawunwetshiwe noma wawusikiwe. Ngicela ungitshele ukuthi ngabe kukhona yini kokulandelayo owakuzwa ngesikhathi kwenziwa lokhu noma ngemuva kwakho (okuphathelene nalokhu)

(PLEASE SELECT ALL THAT APPLY.)

Akukho Buhlungu noma Ukungaphatheki Kahle  Kwakubuhungu Kakhulu  Ukopha okuncane Okuvela Esithweni Sovesifazane Sangasesen(okungaphathelene Nesikhathi Sangenyanga)  Ukuchama Kwakubuhlungu  Ngazama Ukungachami Ukuze Ngingezulimala  Isitho Sami Sangasese/Izindebe Zami Zatheleleka  Isitho Sami Sangasese/Izindebe Zami Zazivuvukele  Intombazane (Ngaphandle Kwami) Yagula kakhulu Enkanjini  Intombazane Yashona Enkanjini

Ubune minyaka emingakhi ngesikhathi loku kwenziwa

0-2 years  3-7 years  7-12 years  13-18 years  >19 years



## Gendernorms

Are you currently dating a man or woman?

(IF DATING MALE & FEMALE, ASK NEXT QUESTIONS ABOUT MALE PARTNER)

Male  Female  Both  No One

How old is your partner?

(IF NO PARTNER, ASK ABOUT MOST RECENT PARTNER)

Does your partner currently do anything to earn money?

No  Yes

Does your partner know that you sell sex?

Yes  No

Does your partner drink alcohol? How often?

Never  Every Day/Nearly Every Day  Only At Weekends  A Few Times in A Month  
 Less Than Once A Month  I Don'T Know

Have you ever quarrelled or had any other conflict over his/her drinking?

No  Yes

Does your partner smoke dagga or take other drugs? How often?

Never  Every Day/Nearly Every Day  Only At Weekends  A Few Times in A Month  
 Less Than Once A Month  I Don'T Know

Na ha jwale o intsha le motho wa monna kapa mosadi?

Motho e Motona  Motshehadi  Ha ho na motho

Molekane wa hao o dilemo tse kae?

(IF NO PARTNER, ASK ABOUT MOST RECENT PARTNER)

Na ha jwale molekane wa hao ho na le ntho eo a e etsang ho fumana tjhelete?

Tjhe  E

Na molekane wa hao o nwa jwala? Ha kae?

Ho hang  Letsatsi le leng le le leng/Nako e ka etsang Letsatsi le leng le le leng  Mafelo a Beke Feela  
 Makgetlo a Mmalwa Kgweding  Ka tlase ho Lekgetlo le le leng ka Kgwedi  Ha ke Tsebe

Na le kile la omanyana kapa la ba le ho se dumellane hofe kapa hofe ka ho nwa ha hae?

Tjhe  E

Na molekane wa hao o tsuba matekwane kapa o sebedisa dithethefatsi tse ding? Makgetlo a makae?

- Ho hang    Letsatsi le leng le le leng/Nako e ka etsang Letsatsi le leng le le leng    Mafelo a Beke Feela  
 Makgetlo a Mmalwa Kgweding    Ka tlase ho Lekgetlo le le leng ka Kgwedi    Ha ke Tsebe

Njengamanje uthandana nendoda noma nomuntu wesifazane?

- Owesilisa    Owesifazane    Akukho Muntu

Mdala kangakanani umlingani wakho?

(IF NO PARTNER, ASK ABOUT MOST RECENT PARTNER)

Ingabe umlingani wakho kukhona akwenzayo ukuthola imali?

- Cha    Yebo

Umlingani wakho uyabuphuza utshwala? Uvamise kangakanani?

- Neze Nhlobo    Zonke Izinsuku/Cishe Zonke Izinsuku    Ngezimpelasonto Kuphela  
 Izikhathi Ezimbalwa Ngenyanga    Ngaphansi Kokukodwa Ngenyanga    Angazi

Nike naxabana yini noma naba nayiphi nje enye ingxabano ngokuphuza kwakhe?

- Cha    Yebo

Ingabe umlingani wakho uyayibhema insangu noma athathe ezinye izidakamizwa? Uvamise kangakanani?

- Neze Nhlobo    Zonke Izinsuku/Cishe Zonke Izinsuku    Ngezimpelasonto Kuphela  
 Izikhathi Ezimbalwa Ngenyanga    Ngaphansi Kokukodwa Ngenyanga    Angazi

# Pregnancy

How old were you when you first had sex?

\_\_\_\_\_

Which of the following statements most closely describes your experiences the first time you had sexual intercourse?

I Was Willing    I Was Persuaded    I Was Tricked    I Was Forced    I Was Raped

Are you currently doing something or using any method to delay or avoid getting pregnant?  
(IF NO, SKIP TO E4)

No    Yes

Which method are you using?

The Injection    Pill    Condoms    The Loop (IUD)    Implant    Herbal or Other Traditional Medicines    Condoms and the Pill or Injection    Withdrawal Before Sperming (Ejactulation)  
 Other

Have you ever been pregnant?  
(IF NO, SKIP TO E9 AND CONFIRM)

No    Yes

How old were you when you first became pregnant

\_\_\_\_\_

How many children have you given birth to ?

\_\_\_\_\_

Have any of your children died after birth (this could be immediately afterwards or ever)?  
(IF NO, SKIP TO E9 AND CONFIRM)

No    Yes

How many of your children have died?

\_\_\_\_\_

Are you pregnant now?  
(IF NO OR UNSURE, SKIP TO E11)

No    Yes    Unsure

How many months pregnant are you?

\_\_\_\_\_

Have you ever had a termination of pregnancy/abortion?  
(IF UNSURE, PLEASE CLARIFY WHAT A TOP/ABOTION IS. THEN RE-ASK QUESTION.)

No    Yes  

In your lifetime, how many abortionss have you successfully had?

\_\_\_\_\_

O ne o le dilemo tse kae ha o qala ho etsa thobalano?

\_\_\_\_\_

Ke seteitemente sefe ho tse latelang se hlalolang dintho tse o etsahalletseng lekgetlong la ho qala ha o etsa thobalano?

- Ke ne ke Batla    Ke ile ka Ferehwa    Ke ile ka Qhekanyetswa    Ke ile ka Qobellwa  
 Ke ile ka Betwa

Ana ha jwale ho na le ntho eo o e etsang kapa o sebedisa mokgwa ofe kapa ofe ho diehisa kapa ho qoba ho ima?  
(IF NO, SKIP TO E4)

- Tjhe    E

O sebedisa mokgwa ofe?

- O a hlaba    Pidisi    Dikhondomo    Lupu (IUD)    Implant    Ditlamma kapa Ditlhare tse ding tsa Setso    Dikhondomo le Pidisi kapa Ho hlaba    O ikgula Pele le Sepema (Rota)    Mokgwa o mong

Na o kile wa ima?

(IF NO, SKIP TO E9 AND CONFIRM)

- Tjhe    E

O ne o le dilemo tse kae ha o qala ho ima?

\_\_\_\_\_

O behile bana ba bakae?

\_\_\_\_\_

Na ho na le ngwana ofe kapa ofe wa bana ba hao ya hlokaletseng ka mora peleho (hona ho ka ba hanghang ka mora moo kapa kgale)?

(IF NO, SKIP TO E9 AND CONFIRM)

- Tjhe    E

Bana ba hao ba hlokaletseng ba bakae?

\_\_\_\_\_

Na ha jwale o moimana?

(IF NO OR UNSURE, SKIP TO E11)

- Tjhe    E    Ha ke na bonnete

Ke dikgwedi tse kae o le mmeleng?

\_\_\_\_\_

Na o kile wa ntsha mpa?

(IF UNSURE, PLEASE CLARIFY WHAT A TOP/ABOTION IS. THEN RE-ASK QUESTION.)

- Tjhe    E

Bophelong ba hao, o bile le katleho ya ho ntsha mpa hakae?

\_\_\_\_\_

Wawungakanani lapho uqala ukuya ocansini?

\_\_\_\_\_

Yisiphi kuzitatimende ezilandelayo ezichaza ngokusondele kakhulu olwazini lwakho okokuqala wenza ucansi?

Ngangifisa  Ngancengwa  Ngaphicwa  Ngaphoqwa  Ngadlwengulwa

Ingabe njengamanje kukhona okusebenzisa noma indlela nanoma iyiphi ukuthi wephuze noma ugweme ukukhulelwa?

Cha  Yebo

Usebenzisa yiphi indlela?

Umjovo  Iphilisi  Amakhondomu  Iluphu (IUD)  Okufakwayo  Amakhambi noma Eminye Imithi Engamakhambi  Amakhondomu kanye nePhilisi noma Umjovo  Ukukhipha Ngaphambi Kokukhipha Isidoda (Ukuchama)  Okunye

Sewake wakhulelwa yini?

Cha  Yebo

Wawungakanani lapho ukhulelwa okokuqala?

\_\_\_\_\_

Zingaki izingane owazibeletha?

\_\_\_\_\_

Ikhona yini ezinganeni zakho eyashona ngemuva kokubelethwa (lokhu kungaba ngokushesha ngemuva noma nje)?

Cha  Yebo

Zingaki ezinganeni zakho ezashona?

\_\_\_\_\_

Ukhulelwe yini manje?

Cha  Yebo  Anginasiqiniseko

Unezinyanga ezingaki ukhulelwe?

\_\_\_\_\_

Sewake wasikhipha isisu?

(IF UNSURE, PLEASE CLARIFY WHAT A TOP/ABORTION IS. THEN RE-ASK QUESTION.)

Cha  Yebo

Empilweni yakho yonke, zingaki izisu owazikhipha ngempumelelo?

\_\_\_\_\_

# Violence

---

---

**Please answer each statement with never, once, a few or many times. These questions are about your main partner, an ex or kwapheni.**

Within the past year did any partner insult you or make you feel bad about yourself?  
(IF NEVER, ASK 216 AS WELL)

Never  Once  Few  Many

Within the past year did any partner make a show off of you (belittle) or humiliate you in front of other people?  
(IF NEVER, ASK 216 AS WELL)

Never  Once  Few  Many

Within the past year did any partner do things to scare or intimidate you on purpose for example by the way he looked at you, by yelling or smashing things?  
(IF NEVER, ASK 216 AS WELL)

Never  Once  Few  Many

Within the past year did any partner threaten to hurt you?  
(IF NEVER, ASK 216 AS WELL)

Never  Once  Few  Many

More than a year ago did any boyfriend do any of these things to you?

Yes  No

Within the past year did any partner slap you, push you or throw something at you which could hurt you?

Never  Once  Few  Many

Within the past year did any partner hit you with a fist or with something else (such as a beer bottle, stick or belt) which could hurt you?

Never  Once  Few  Many

Within the past year did any partner kick, drag, beat, choke or burn you?

Never  Once  Few  Many

Within the past year did any partner threaten to use or actually use a gun, knife or other weapon against you?

Never  Once  Few  Many

More than a year ago did any partner physically hurt you in any of these ways?

Yes  No

Within the past year did any partner physically force you to have sex when you did not want to?

Never  Once  Few  Many

Within the past year did you have sex with any partner when you did not want to because you were afraid of what he might do?

- Never  Once  Few  Many

How many times has this happened to you in the past 12 months

\_\_\_\_\_

More than a year ago did any partner force you to do anything sexual when you did not want to?

- Yes  No

When was the most recent time you were made to have sex with a partner when you did not want it?

\_\_\_\_\_  
(IF NEVER, ENTER 01-01-0001)

More than a year ago did any partner make a show off of you (belittle) or humiliate you in front of other people?

- Never  Once  Few  Many

More than a year ago did any partner threaten to hurt you?

- Never  Once  Few  Many

---

---

### **These questions are about mcimbi**

Within the past year did any Mcimbi slap you, push you or throw something at you which could hurt you?

- Never  Once  Few  Many

Within the past year did any Mcimbi hit you with a fist or with something else (such as a beer bottle, stick or belt) which could hurt you?

- Never  Once  Few  Many

Within the past year did any Mcimbi kick, drag, beat, choke or burn you?

- Never  Once  Few  Many

Within the past year did any Mcimbi threaten to use or actually use a gun, knife or other weapon against you?

- Never  Once  Few  Many

More than a year ago did any Mcimbi physically hurt you in any of these ways?

- Yes  No

Within the past year did any Mcimbi physically force you to have sex when you did not want to?

- Never  Once  Few  Many

Within the past year did you have sex with any Mcimbi when you did not want to because you were afraid of what he might do?

- Never  Once  Few  Many

How many times has this happened to you in the past 12 months

\_\_\_\_\_

More than a year ago did any Mcimbi force you to do anything sexual when you did not want to?

Yes  No

When was the most recent time you were made to have sex with an Mcimbi when you did not want it?

\_\_\_\_\_  
(IF NEVER, ENTER 01-01-0001)

---

---

### These questions are about Police

Within the past year did any Police slap you, push you or throw something at you which could hurt you?

Never  Once  Few  Many

Within the past year did any Police hit you with a fist or with something else (such as a beer bottle, stick or belt) which could hurt you?

Never  Once  Few  Many

Within the past year did any Police kick, drag, beat, choke or burn you?

Never  Once  Few  Many

Within the past year did any Police threaten to use or actually use a gun, knife or other weapon against you?

Never  Once  Few  Many

More than a year ago did any Police physically hurt you in any of these ways?

Yes  No

Within the past year did any Police physically force you to have sex when you did not want to?

Never  Once  Few  Many

Within the past year did you have sex with any Police when you did not want to because you were afraid of what he might do?

Never  Once  Few  Many

How many times has this happened to you in the past 12 months

\_\_\_\_\_

More than a year ago did any Police force you to do anything sexual when you did not want to?

Yes  No

When was the most recent time you were made to have sex with a Policeman when you did not want it?

\_\_\_\_\_  
(IF NEVER, ENTER 01-01-0001)

Have you ever experienced gang rape?

Yes  No

How often has this happened

\_\_\_\_\_



**Please answer each statement with never, once, a few or many times. These questions are about your main partner, an ex or kwapheni.**

Selemo se fetileng, na ho na le molekane ofe kapa ofe ya o rohakileng kapa a etsa hore o ikutlwe hampe?  
(IF NEVER, ASK 216 AS WELL)

- Ho hang    Ha nngwe    Makgetlo a Mmalwa    Ha ngata

Selemong se fetileng, na ho na le molekane ofe kapa ofe ya o nyatsitseng kapa a o phoqa ka pela batho ba bang?  
(IF NEVER, ASK 216 AS WELL)

- Ho hang    Ha nngwe    Makgetlo a Mmalwa    Ha ngata

Selemong se fetileng, na ho na le molekane ofe kapa ofe ya entseng dintho ho o tshosa kapa ho o tshabisa ka boomo, ho etsa mohlala, ka tsela eo a o shebileng ka yona, ka ho o omanya kapa ho thuba dintho?  
(IF NEVER, ASK 216 AS WELL)

- Ho hang    Ha nngwe    Makgetlo a Mmalwa    Ha ngata

Selemong se fetileng, na ho na le molekane ofe kapa ofe ya tshoseditseng ho o utlwisahloko?  
(IF NEVER, ASK 216 AS WELL)

- Ho hang    Ha nngwe    Makgetlo a Mmalwa    Ha ngata

Nakong e fetang selemo e fetileng, na ho na le mohlankana ofe kapa ofe ya o entseng ntho efe kapa efe ya tse latelang?

- E    Tjhe

Selemong se fetileng, na ho na le molekane ofe kapa ofe ya o otlileng, ya o sutuditseng kapa a o lahlella ka ho hong ho neng ho ka o utlwisahloko?

- Ho hang    Ha nngwe    Makgetlo a Mmalwa    Ha ngata

Selemong se fetileng, na ho na le molekane ofe kapa ofe ya o otlileng ka feisi kapa ka ntho e nngwe (e jwaloka lebotlolo la biya, thupa kapa lebanta), le neng le ka o utlwisahloko?

- Ho hang    Ha nngwe    Makgetlo a Mmalwa    Ha ngata

Selemong se fetileng, na ho na le molekane ofe kapa ofe ya o rahileng, a o hulanya, a o otlala, a o tshouka kapa a o tjhesa?

- Ho hang    Ha nngwe    Makgetlo a Mmalwa    Ha ngata

Selemong se fetileng, na ho na le molekane ofe kapa ofe ya tshoseditseng ho sebedisa kapa ya sebedisitseng sethunya, thipa kapa sebetsa se seng ho wena?

- Ho hang    Ha nngwe    Makgetlo a Mmalwa    Ha ngata

Pele ho dikgwedi tse 12 tse fetileng na ho na le molekane ofe kapa ofe ya o utlwisitseng bohloko mmeleng ka tsela efe kapa efe ya tse latelang?

- E    Tjhe

Selemo se fetileng, na molekane ofe kapa ofe o o qobelletse ho etsa thobalano ha o ne o sa batle?

- Ho hang    Ha nngwe    Makgetlo a Mmalwa    Ha ngata

Selemo se fetileng, na o entse thobalano le molekane ofe kapa ofe ha o ne o sa batle hobane o ne o tshohile seo a ka se etsang?

- Ho hang  Ha nngwe  Makgetlo a Mmalwa  Ha ngata

How many times has this happened to you in the past 12 months

\_\_\_\_\_

Ho feta selemo se se ngwe se fetileng, na ho na le molekane ofe kapa ofe ya o qobelletseng ho etsa ntho efe kapa efe ya thobalano ha o ne o sa batle ho etsa?

- E  Tjhe

Lekgetlo le sa tswa feta leo o entsweng hore o etse thobalano le molekane o sa e batle le ne le le neng?

\_\_\_\_\_  
(IF NEVER, ENTER 01-01-0001)

Ho feta selemo se se ngwe se fetileng, na ho na le molekane ofe kapa ofe ya o kenyeditseng mahlo (nyatsitseng) kapa a o etsa setshehisa ka pela batho ba bang?

- Ho hang  Ha nngwe  Makgetlo a Mmalwa  Ha ngata

Ho feta selemo se se ngwe se fetileng, na ho na le molekane ofe kapa ofe ya tshoseditseng ho o utlwisahloko?

- Ho hang  Ha nngwe  Makgetlo a Mmalwa  Ha ngata

### These questions are about mcimbi

Selemong se fetileng, na ho na le Mcimbi ofe kapa ofe o o otlileng, wa o sututsa kapa wa o lahlella ka ntho e nngwe e neng e ka o utlwisahloko?

- Ho hang  Ha nngwe  Makgetlo a Mmalwa  Ha ngata

Selemong se fetileng, na ho na le Mcimbi ofe kapa ofe o o otlileng ka feisi kapa ka ntho e nngwe (e jwaloka lebotlolo la biya, thupa kapa lebanta), le neng ho ka o utlwisahloko?

- Ho hang  Ha nngwe  Makgetlo a Mmalwa  Ha ngata

Selemong se fetileng, na ho na le Mcimbi ofe kapa ofe o o rahileng, wa o hulanya, wa o otlala, wa o tshouka kapa wa o tshesa?

- Ho hang  Ha nngwe  Makgetlo a Mmalwa  Ha ngata

Selemong se fetileng, na ho na le Mcimbi ofe kapa ofe o o tshoseditseng ho sebedisa kapa o sebedisitseng sethunya, thipa kapa sebetsa se seng ho wena?

- Ho hang  Ha nngwe  Makgetlo a Mmalwa  Ha ngata

Ho feta selemo se se ngwe se fetileng, na ho na le Mcimbi ofe kapa ofe o o utlwisitseng bohloko mmeleng ka tsela efe kapa efe ya tse latelang?

- E  Tjhe

Selemong se fetileng, na Mcimbi ofe kapa ofe o o qobelletse ho etsa thobalano ha o ne o sa batle?

- Ho hang  Ha nngwe  Makgetlo a Mmalwa  Ha ngata

Selemong se fetileng, na o entse thobalano le Mcimbi ofe kapa ofe ha o ne o sa batle hobane o ne o tshohile seo a ka se etsang?

- Ho hang  Ha nngwe  Makgetlo a Mmalwa  Ha ngata

How many times has this happened to you in the past 12 months

\_\_\_\_\_

Ho feta selemo se se ngwe se fetileng, na Mcimbi ofe kapa ofe o o qobelletse ho etsa ntho efe kapa efe ya thobalano ha o ne o sa batle ho etsa?

- E  Tjhe

Lekgetlo le sa tswa feta leo o entsweng hore o etse thobalano le Mcimbi o sa e batle le ne le le neng?

\_\_\_\_\_

(IF NEVER, ENTER 01-01-0001)

---



---

### These questions are about Police

Selemong se fetileng, na ho na le Lepolesa lefe kapa lefe le o otlileng, la o sututsa kapa la o lahlella ka ntho e nngwe e neng e ka o utlwisa bohloko?

- Ho hang  Ha nngwe  Makgetlo a Mmalwa  Ha ngata

Selemong se fetileng, na ho na le Lepolesa lefe kapa lefe le o otlileng ka feisi kapa ka ntho e nngwe (e jwaloka lebotlolo la biya, thupa kapa lebanta), le neng le ka o utlwisa bohloko?

- Ho hang  Ha nngwe  Makgetlo a Mmalwa  Ha ngata

Selemong se fetileng, na ho na le Lepolesa lefe kapa lefe le o rahileng, la o hulanya, la o otlia, la o tjhousa kapa la o tjhosa?

- Ho hang  Ha nngwe  Makgetlo a Mmalwa  Ha ngata

Selemong se fetileng, na ho na le Lepolesa lefe kapa lefe le o tshoseditseng ho sebedisa kapa le sebedisitseng sethunya, thipa kapa sebetsa se seng ho wena?

- Ho hang  Ha nngwe  Makgetlo a Mmalwa  Ha ngata

Ho feta selemo se se ngwe se fetileng, na Lepolesa lefe kapa lefe le o utlwisitseng bohloko mmeleng ka tsela efe kapa efe ya tse latelang?

- E  Tjhe

Selemong se fetileng, na Lepolesa lefe kapa lefe le o qobelletse ho etsa thobalano ha o ne o sa batle?

- Ho hang  Ha nngwe  Makgetlo a Mmalwa  Ha ngata

Selemong se fetileng, na o entse thobalano le Lepolesa lefe kapa lefe ha o ne o sa batle hobane o ne o tshohile seo le ka se etsang?

- Ho hang    Ha nngwe    Makgetlo a Mmalwa    Ha ngata

Sena se o etsahalletse ka makgetlo a makae dikgweding tse 12 tse fetileng?

\_\_\_\_\_

Ho feta selemo se se ngwe se fetileng, na Lepolesa lefe kapa lefe le o qobelletse ho etsa ntho efe kapa efe ya thobalano ha o ne o sa batle ho e etsa?

- E    Tjhe

Lekgetlo le sa tswa feta leo o entsweng hore o etse thobalano le Lepolesa o sa e batle le ne le le neng?

\_\_\_\_\_

(IF NEVER, ENTER 01-01-0001)

Na o kile wa betwa ke motho ya fetang a le mong?

- E    Tjhe

Sena se etsahetse ka makgetlo a makae?

\_\_\_\_\_

---

**Please answer each statement with never, once, a few or many times.**

Onyakeni odlule, kukhona yini umlingani owakuthuka noma wakwenza awangaphatheka kahle ngobuwena uqobo?  
(IF NEVER, ASK 216 AS WELL)

- Neze nhlobo    kanye    Kambalwa    Kaningi

Onyakeni odlule, kukhona yini umlingani owabukisa ngawe (wakwehlisa isithunzi) noma wakuhlaza phambi kwabanye abantu?  
(IF NEVER, ASK 216 AS WELL)

- Neze nhlobo    kanye    Kambalwa    Kaningi

Onyakeni odlule, kukhona yini umlingani owenza izinto ukukwesabisa noma ukukwethusa ngenhloso njengendlela akubuka ngayo, ngokuthetha noma ngokuphihliza izinto?  
(IF NEVER, ASK 216 AS WELL)

- Neze nhlobo    kanye    Kambalwa    Kaningi

Onyakeni odlule, ukhona yini umlingani owake wesabisa ngokukulimaza?  
(IF NEVER, ASK 216 AS WELL)

- Neze nhlobo    kanye    Kambalwa    Kaningi

Ngaphambi konyaka owodwa odlule, ingabe likhona isoka elenza okunye kwalezi zinto kuwe?

- Yebo    Cha

Onyakeni odlule, ingabe ukhona yini umlingani owakushaya ngempama, owakufuqa noma owakujikijela ngento eyayingahle ikulimaze?

- Neze nhlobo  kanye  Kambalwa  Kaningi

Onyakeni odlule, ingabe ukhona yini umlingani owakushaya ngesibhakela noma ngenye into (enjengebhodlela likabhiya, induku noma ibhande) eyayingahle ikulimaze?

- Neze nhlobo  kanye  Kambalwa  Kaningi

Onyakeni odlule, ingabe ukhona yini umlingani owakukhahlela, owakuhudula, owakushaya, owakuklinya noma owakushisa?

- Neze nhlobo  kanye  Kambalwa  Kaningi

Onyakeni odlule, ingabe ukhona yini umlingani owakwesabisa noma owasebenzisa isibhamu, ummese noma esinye isikhali kuwe ngempela?

- Neze nhlobo  kanye  Kambalwa  Kaningi

Ngaphambi konyaka owodwa odlule, ingabe ukhona yini umlingani owakulimaza ngokomzimba nganoma iyiphi yalezi zindlela?

- Yebo  Cha

Onyakeni odlule, ingabe ukhona yini umlingani owakuphoqa ngokomzimba ukuthi uye ocansini wena ungafuni?

- Neze nhlobo  kanye  Kambalwa  Kaningi

Onyakeni odlule, ukhona yini umlingani owaya naye ocansini ungafuni ngenxa yokuthi wawesaba ayengahle akwenze?

- Neze nhlobo  kanye  Kambalwa  Kaningi

How many times has this happened to you in the past 12 months

---

Ngaphambi konyaka owodwa odlule, ukhona yini umlingani owakuphoqa ukuthi wenze nanoma yini ephathelene nocansi ungafuni?

- Yebo  Cha

Yisiphi isikhathi esisandukudlula kakhulu owenziwe ukuthi uye ocansini nomlingani ungalufuni

---

(IF NEVER, ENTER 01-01-0001)

Ngaphambi konyaka owodwa odlule, ukhona yini umlingani owabukisa ngawe (wakwehlisa isithunzi) noma wakuhlaza phambi kwabanye abantu?

- Neze nhlobo  kanye  Kambalwa  Kaningi

Ngaphambi konyaka owodwa odlule, ukhona yini umlingani owesabisa ngokukulimaza?

- Neze nhlobo  kanye  Kambalwa  Kaningi

---

---

**These questions are about mcimbi**

Onyakeni odlule, kukhona yini uMcimbi okushaye ngempama, owakufuqa noma wakujikijela ngento eyayingahle ikulimaze?

- Neze nhlobo  kanye  Kambalwa  Kaningi

Onyakeni odlule, ukhona yini uMcimbi owakushaya ngesibhakela noma ngenye into (efana nebhodlela likabhiya, induku noma ibhande) eyayingahle ikulimaze?

- Neze nhlobo  kanye  Kambalwa  Kaningi

Onyakeni odlule, ingabe ukhona yini uMcimbi owakukhahlela, owakuhudula, owakushaya, owakuklinya noma owakushisa?

- Neze nhlobo  kanye  Kambalwa  Kaningi

Onyakeni odlule, ukhona yini uMcimbi owesabisa ngokusebenzisa noma owasebenzisa isibhamu, ummese noma esinye isikhali ngempela kuwe?

- Neze nhlobo  kanye  Kambalwa  Kaningi

Ngaphambi konyaka owodwa odlule, ukhona yini uMcimbi owakulimaza ngokomzimba ngananoma iyiphi kulezi zindlela?

- Yebo  Cha

Onyakeni odlule, ukhona yini uMcimbi owakuphoqa ngokomzimba ukuthi uye ocansini ungafuni?

- Neze nhlobo  kanye  Kambalwa  Kaningi

Onyakeni odlule, ukhona yini uMcimbi owaya naye ocansini ungafuni ngenxa yokuthi wawesaba owawungahle ukwenze?

- Neze nhlobo  kanye  Kambalwa  Kaningi

How many times has this happened to you in the past 12 months

\_\_\_\_\_

Ngaphambi konyaka owodwa odlule, ukhona yini uMcimbi owakuphoqa ukuthi wenze nanoma yini ephathelene nocansi wena ungafuni?

- Yebo  Cha

Yisiphi isikhathi esisandakudlula kakhulu lapho owenziwa khona ukuthi uye ocansini noMcimbi wena ungalufuni?

\_\_\_\_\_ (IF NEVER, ENTER 01-01-0001)

---

---

**These questions are about Police**

Onyakeni odlule, likhona yini iPhoyisa elakushaya ngempama, lakufuqa noma lakujikijela ngento eyayingahle ikulimaze?

- Neze nhlobo  kanye  Kambalwa  Kaningi

Onyakeni odlule, likhona yini iPhoyisa elikushaye ngesibhakela noma ngenye into (efana nebhodlela, induku noma ibhande) okungahle kukulimaze?

- Neze nhlobo  kanye  Kambalwa  Kaningi

Onyakeni odlule, likhona yini iPhoyisa elakukhahlela, elakuhudula, elakushaya, elakuklinya noma elakushisa?

- Neze nhlobo  kanye  Kambalwa  Kaningi

Ezinyangeni eziyi-12 ezedlule, likhona yini iPhoyisa elasabisa ngokusebenzisa noma elasebenzisa isibhamu, ummese noma esinye isikhali ngempela kuwe?

- Neze nhlobo  kanye  Kambalwa  Kaningi

Ngaphambi konyaka owodwa odlule, likhona yini iPhoyisa elakulimaza ngokomzimba ngananoma iyiphi kulezi zindlela?

- Yebo  Cha

Onyakeni odlule, likhona yini iPhoyisa elikuphoqe ngokomzimba ukuthi uye nalo ocansini wena ungafuni?

- Neze nhlobo  kanye  Kambalwa  Kaningi

Onyakeni odlule, kukhona yini iPhoyisa nanoma yiliphi oye nalo ocansini ungafuni ngenxa yokwesaba elingahle likwenze?

- Neze nhlobo  kanye  Kambalwa  Kaningi

Onyakeni odlule, kukhona yini iPhoyisa elikuphoqe ukuthi wenze ucansi ngomlomo nalo wena ungafuni?

- Neze nhlobo  kanye  Kambalwa  Kaningi

Onyakeni odlule, kukhona yini iPhoyisa elikuphoqe ukuthi wenze ucansi lwasendunu nalo wena ungafuni?

- Neze nhlobo  kanye  Kambalwa  Kaningi

Yisiphi isikhathi esisandakudlula kakhulu lapho owenziwa khona ukuthi uye ocansini nePhoyisa wena ungalufuni?

\_\_\_\_\_  
(IF NEVER, ENTER 01-01-0001)

Kwenzeke izikhathi eziningi kangakanani lokhu ezinyangeni ezi-12 ezedlule?

\_\_\_\_\_  
Ngaphambi konyaka owodwa odlule, likhona yini iPhoyisa elakuphoqa ukuthi wenze nanoma yini ephathelene nocansi wena ungafuni?

- Yebo  Cha

Uke wahlangabezana nokudlwengulwa abantu abame umugqa?

- Yebo  Cha

Kwenzeke kaningi kangakanani lokhu

## Sex

When was the last time you had sex (normal (vagina)/anal/oral)?

\_\_\_\_\_

The last time you had sex did you use a condom?  
(IF NO, SKIP TO 278)

Yes  No

Did you use a condom for every round (a round is until he cums/ejaculates/sperms)?

Yes  No

Who brought the condom, was it you or your partner?

Self  Partner  Both

Did you experience any of the following with the condom?

Condom Breaking/Busting  Condom Slipping Off  Condom Only Put On Half Way  
 Condom Was Removed During Sex  No Problems, Condom Worked Perfectly

The last time you had sex, who was it with (a main partner, kwhapheni, mcimbi or nonpaying one night stand or ex-partner)?

Regter/Main Partner/Vat 'N Sit  Makhwapheni  Mcimbi  Ex Partner  One Night Stand

Have you used condoms with your MAIN PARTNER in the past month? Would you say you used them always, often or sometimes?

Not Used  Always  Often  Sometimes

How many MAIN PARTNERS have you had sex with in the last year?

\_\_\_\_\_

How many KHWAPHENI have had sex with during the past year?

\_\_\_\_\_

How many one night stands have you had sex with during the past year?

\_\_\_\_\_

Over the last year how often have you experienced the condom breaking or slipping off or only put it on half way through or have you taken it off and continued love making?

Every Time Used  Often  Sometimes  Never  No Use

In the past 6 months have you experienced any of the following symptoms?  
(IF NO SYMPTOMS EXPERIENCED, SKIP TO G14)

Painful or Burning Vagina when Urinate  Sores or Boils Around Vagina  Itching Vagina  
 Abnormal Vaginal Discharge  Pain in The Bottom Of Your Stomach (Not Related To Your Menstrual Period Or Using The Loop)  None Of These Symptoms



Did you receive treatment for the symptoms you just mentioned?

Yes  No

Have you ever been diagnosed with a sexually transmitted disease such as gonorrhea, syphilis, chlamydia, genital warts, or genital herpes

Yes  No  Unsure  Refused To Answer

Please select all of the different services that you offer

Talking Or Companionship in Person  Massage  Dinner  Breast Flashing  Over The Phone Sex (Talking)  Whatsapp/Sms Sex  Internet/Email/Online Sex  Normal Sex (vagina)  Anal Sex  blow job (oral sex)  Hand Job  Stripping Or Dancing  Group Sex  Other

Please select the one services that is your most popular (that most mcimbi ask for)

Talking Or Companionship in Person  Massage  Dinner  Breast Flashing  Over The Phone Sex (Talking)  Whatsapp/Sms Sex  Internet/Email/Online Sex  Normal Sex (vagina)  Anal Sex  blow job (oral sex)  Hand Job  Stripping Or Dancing  Group Sex  Other

In the past week, how many days did you have oral,anal or Normal sex (vagina) with mcimbi

\_\_\_\_\_

In the past month, how many days did you work have oral, anal or Normal sex (vagina) with mcimbi

\_\_\_\_\_

(MUST BE MORE THAN PREVIOUS)

How many one-time mcimbi did you have sex with in the last working DAY?

\_\_\_\_\_

How many one-time mcimbi did you have sex with in the past WEEK?

\_\_\_\_\_

(MUST BE MORE THAN PREVIOUS)

The last time you had sex with one-time mcimbi did you go with a condom?

Without Condom  Male Condom  Female Condom  Male and Female Condom

Do you always go with a condom with your one-time mcimbi?

Every Time Used  Often  Sometimes  Never  No Use

How many of your regulars did you have sex with in the last working day?

\_\_\_\_\_

How many of your regulars did you have sex with in the past week?

\_\_\_\_\_

(MUST BE MORE THAN PREVIOUS)

The last time you had sex with regular mcimbi did you go with a condom?

Without (Condom)  Male Condom  Female Condom  Male and Female Condom

Has there been any occasion in the past month when either a regular or a one-time Mcimbi went without a condom for any reason when you were having sex?

Yes  No  Refused Answer

Do you always work in the same place?

Yes  No

How many different places did you practise sex work in the past 6 months? (different taverns and different street corners, etc)

\_\_\_\_\_

Have you ever worked as a sex worker in another province in South Africa

Yes  No

Have you ever worked as a sex worker in another country, not South Africa?

Yes  No

How much were you paid the last time you had Normal sex (vagina)?

\_\_\_\_\_

(number)

How much did you earn the last day that you sold sex?

\_\_\_\_\_

(number)

What is the maximum amount that you earned in 1 day this last month end (month end)

\_\_\_\_\_

(number)

What is the minimum amount that you earned in 1 day this last month (mid month)

\_\_\_\_\_

(number)

In the last month have you used anything to dry, clean or tighten your vagina before having sex? Have you done this every time, some times, just once or not at all?  
(IF NEVER, SKIP TO G36)

Everytime  Sometimes  Once  Never

What have you used?  
(PLEASE MARK ALL THAT APPLY)

Soap  Herbs/Snuff  Ice/Water  Zamlandela/Tiger Balm  Alone Stone  Brown Paper  
 Ming Balls  Other

In the last month have you used anything to lubricate your vagina before having sex? Have you done this every time, some times, just once or not at all?

(IF NEVER, SKIP TO G38)

Everytime  Sometimes  Once  Never

What have you used?

(PLEASE MARK ALL THAT APPLY)

Lubricant  Soap  Spit  Vaseline  Baby Oil  Other

In the last month have you used anything to hide that you were bleeding/menstruating, while having sex? Have you done this every time you bled, some times when you bled, just once or not at all?

(IF NEVER, SKIP TO G40)

Everytime  Sometimes  Once  Never

What have you used?

(PLEASE MARK ALL THAT APPLY)

Tampon  Kitchen Sponge  Cloth  Cotton Wool  Toilet Paper  Nacosa Condom  
 Brown paper  Other

**Please answer each of the following statements with never, once, a few times or often.**

Within the past year have you been verbally insulted, harassed or threatennd because you are a sex worker?

Never  Once  A Few Times  Often

Within the past year have you been beaten or threatennd because you are a sex worker?

Never  Once  A Few Times  Often

Within the past year have you experienced sexual abuse because you are a sex worker?

Never  Once  A Few Times  Often

Within the past year have any of your family (partner, children, siblings etc) experienced discrimination as a result of your being a sex worker?

Never  Once  A Few Times  Often

Within the past year how often have you been forced to change where you live because you are a sex worker?

Never  Once  A Few Times  Often

Within the past year have you been denied health services because you are a sex worker?

Never  Once  A Few Times  Often

Within the past year have you been denied police assistance/services because you are a sex worker?

Never  Once  A Few Times  Often

---

---

**Please answer each of the following statements with strongly agree, agree, disagree or strongly disagree**

Within the past year I have felt ashamed because I am a sex worker?

Strongly Agree  Agree  Disagree  Strongly Disagree

Within the past year I have felt guilty because I am a sex worker?

Strongly Agree  Agree  Disagree  Strongly Disagree

Within the past year I have blamed myself because I am a sex worker?

Strongly Agree  Agree  Disagree  Strongly Disagree

Within the past year I have blamed others because I am a sex worker?

Strongly Agree  Agree  Disagree  Strongly Disagree

Within the past year I have felt that I am not worth anything because I am a sex worker?

Strongly Agree  Agree  Disagree  Strongly Disagree

Within the past year I have felt punished because I am a sex worker?

Strongly Agree  Agree  Disagree  Strongly Disagree

Within the past year I have felt suicidal because I am a sex worker?

Strongly Agree  Agree  Disagree  Strongly Disagree

Within the past year I have chosen not to attend a party/bashes because of being a sex worker?

Strongly Agree  Agree  Disagree  Strongly Disagree

Within the past year I have isolated myself from friends and family because of being a sex worker?

Strongly Agree  Agree  Disagree  Strongly Disagree

Within the past year I have decided to not have (any more) children because of being a sex worker?

Strongly Agree  Agree  Disagree  Strongly Disagree

Within the past year I have avoided going to the clinic/hospital because of being a sex worker?

Strongly Agree  Agree  Disagree  Strongly Disagree

Within the past year I have avoided going to the police because of being a sex worker?

Strongly Agree  Agree  Disagree  Strongly Disagree

O qetetse neng ho etsa thobalano (ka kukung/ka maraong/ka molomo)?

---

Lekgetlong la ho qetela ha o etsa thobalano na o ile wa sebedisa khondomo?  
(IF NO, SKIP TO 278)

E  Tjhe

Na o sebedisitse khondomo lekgetlong le leng le le leng (round ke ho fihlela a rota)?

- E  Tjhe

Ke mang ya tlileng le khondomo, na ke wena kapa molekane wa hao?

- Ke itletse le yona  Molekane  Bobedi ba rona

Na o bile le ketsahalo efe kapa efe ya tse latelang ka khondomo?

- Khondomo e phunyehang/phatlohang  Khondomo e Tswang  Khondomo e Kentsweng Halofo  
 Khondomo e Tlositswe nakong ya Thobalano  Ha ho a ba le Mathata, Khondomo e sebeditse Hantle

Lekgetlong la ho qetela ha o etsa thobalano, o ne o etsa le mang (regte, makhwaphehi, mcimbi kapa motho ya sa lefeng eo o etsang le yena bosiu bo le bong feela kapa eo e neng e le molekane)

- Regte/Molekane wa Bohlokwa/Vat 'N Sit  Makhwaphehi  Mcimbi  Eo e neng e le Molekane  
 Wa bosiu bo le bong

Na o sebedisitse dikhondomo le MOLEKANE wa hao wa NNETE kgwedding e fetileng? Na o ka re le di sebedisitse ka mehla, kgafetsa kapa ka dinako tse ding?

- Ha re a di Sebedisa  Ka mehla  Kgafetsa  Ka dinako tse ding

O entse thobalano le boregte ba bakae selemong se sa tswa feta?

\_\_\_\_\_

O entse thobalano le bomakhwaphehi ba bakae selemong se fetileng?

\_\_\_\_\_

O entse thobalano le balekane ba bakae ba bosiu bo le bong feela selemong se fetileng?

\_\_\_\_\_

Dilemong tse ka pele ho tse sa tswa feta, ke makgetlo a makae o bileng le ketsahalo ya ho phunyeha ha khondomo kapa ho tswa ha yona kapa ho e kenya halofo feela kapa ho e ntsha le ho tswela pele ho etsa thobalano?

- Re e Sebedisitse Nako e nngwe le e nngwe  Kgafetsa  Ka dinako tse ding  Ho hang  
 Ha e a sebeta

Dikgwedding tse 6 tse fetileng na o etsahalletswe ke efe kapa efe ya tse latelang?  
 (IF NO SYMPTOMS EXPERIENCED, SKIP TO G14)

- Setho sa Bosadi se Bohloko kapa se Tjhesang ha o Rota  Diso tse Potapotileng Kuku  
 Kuku e Hlohlonang  Lero le Sa Tlwaelehang le tswang Kukung  Lehlaba ka Tlisa Mpa (E seng le Amanang le Ho ya Kgwedding kapa Ho sebedisa Lupu)  Ha ho a ba le Matshwao ana

Na o ile wa fumana kalafo ya matshwao ao o sa tswa a bolela?

- E  Tjhe

Na o kile wa hlahlojwa o na le lefu le fetiswang ka thobalano le jwalo ka gonorrhoea, syphilis, chlamydia, genital warts kapa genital herpes?

- E  Tjhe  Ha ke na bonnete  Hanne ho Araba

Ka kopo kgetha ditshebeletso kaofela tseo o fanang ka tsona

- Ho bua kapa Botswalle    Masaje    Dijo tsa Mantsiboya    Breast Flashing    Thobalano ya Mohaleng (Ho bua)    Thobalano ya Whatsapp/Sms    Thobalano ya Inthaneteng/Imeile/Online  
 Thobalano ka Kukung    Thobalano ka Maraong    Thobalano ka Molomo    Hand Job  
 Ho hlobola kapa Ho tantsha    Thobalano ya Sehlopha    E nngwe

Ka kopo kgetha tshebeletso eo o tummeng ka yona (eo boholo ba mcimbi bo e kopang)

- Ho bua kapa Bo Tshwale le Motho    Masaje    Dijo tsa Mantsiboya    Breast Flashing  
 Thobalano ya Mohaleng (Ho bua)    Thobalano ya Whatsapp/Sms    Thobalano ya Inthaneteng/Imeile/Online    Thobalano ka Kukung    Thobalano ka Maraong    Thobalano ka Molomo  
 Hand Job    Ho hlobola kapa Ho tantsha    Thobalano ya Sehlopha    E nngwe

Bekeng e fetileng, o entse thobalano ya molomo, ya ka maraong kapa ka kukung le mcimbi ka matsatsi a makae?

\_\_\_\_\_

Kgweding e fetileng, mosebetsi wa hao o bile le thobalano ya molomo, ya ka maraong kapa ka kukung le mcimbi ka matsatsi a makae?

\_\_\_\_\_  
(MUST BE MORE THAN PREVIOUS)

LETSATSING le qetelang la mosebetsi o entse thobalano le bomcimbi ba bakae ba tlang ha nngwe feela?

\_\_\_\_\_

BEKENG e fetileng o entse thobalano le bomcimbi ba bakae ba tlang ha nngwe feela?

\_\_\_\_\_  
(MUST BE MORE THAN PREVIOUS)

Lekgetlong le fetileng o etsa thobalano le mcimbi ya tlang ha nngwe feela le entse ka khondomo?

- Ntle le Khondomo    Khondomo ya Banna    Khondomo ya Basadi    Khondomo ya Banna le ya Basadi

Na ka mehla le etsa ntle le khondomo le mcimbi ya tlang ha nngwe feela?

- Re e Sebedisitse Nako e nngwe le e nngwe    Kgafetsa    Ka dinako tse ding    Ho hang  
 Ha e a sebetsa

O entse thobalano le batho ba hao ba bakae ba tlwaelehileng letsatsing le qetelang la ho sebetsa?

\_\_\_\_\_

O entse thobalano le batho ba hao ba bakae ba tlwaelehileng bekeng e fetileng?

\_\_\_\_\_  
(MUST BE MORE THAN PREVIOUS)

Lekgetlong le sa tswa feta ha o ne o etsa thobalano le mcimbi wa hao o tlwaelehileng, na le entse ka khondomo?

- Ntle le Khondomo    Khondomo ya Banna    Khondomo ya Basadi    Khondomo ya Banna le ya Basadi

Na ho bile le ketsahalo efe kapa efe kgweding e fetileng, ha motho eo o tlwaetseng ho robala le yena kapa Mcimbi ya tlang ha nngwe feela a kena ntle le khondomo ka lebaka lefe kapa lefe ha le etsa thobalano?

E  Tjhe  Hanne ho araba

Na o sebeletsa sebakeng se le seng kamehla?

E  Tjhe

Dibaka tse fapaneng tseo o etseditseng thobalano ho tsona dikgweding tse 6 tse fetileng di kae? (dithavene tse fapaneng le dihuku tsa diterata tse fapaneng)

Na o kile wa sebetsa jwalo ka sex worker porovsenseng e nngwe Aforika Borwa?

E  Tjhe

Na o kile wa sebetsa jwalo ka sex worker naheng e nngwe eo e seng Aforika Borwa?

E  Tjhe

O lefilwe bokae lekgetlong la ho qetela ha o ne o etsa thobalano e Tlwaelehileng (ya ka kukung)?

\_\_\_\_\_

(number)

O entse bokae letsatsing la ho qetela leo o rekisitseng thobalano ka lona?

\_\_\_\_\_

(number)

Okare boholo batjhelete eo oethotseng kgwedi efetileng kebokae

\_\_\_\_\_

(number)

Okare bonyane batjhelete eo oethotseng kgwedi efetileng kebokae

\_\_\_\_\_

(number)

Kgweding e sa tswa feta na o sebedisitse ntho efe kapa efe ya ho omisa, ho hlwekisa kapa ho tiisa kuku ya hao pele o etsa thobalano? Na o entse sena lekgetlo le leng le le leng, ka dinako tse ding, ha nngwe feela kapa ho hang? (IF NEVER, SKIP TO G36)

Lekgetlo le leng le le leng  Ka dinako tse ding  Ha nngwe  Ho hang

O sebedisitse eng?  
(PLEASE MARK ALL THAT APPLY)

Sesepa  Ditlamma/Seneifi  Aese/Metsi  Zamlandela/Tiger Balm  Alone Stone  
 Pampiri e Sootho  Ming Balls  E nngwe

Kgweding e sa tswa feta na o sebedisitse ntho efe kapa efe ya ho loetsa kuku ya hao pele o etsa thobalano? Na o entse sena lekgetlo le leng le le leng, ka dinako tse ding, ha nngwe feela kapa ho hang? (IF NEVER, SKIP TO G38)

Lekgetlo le leng le le leng  Ka dinako tse ding  Ha nngwe  Ho hang

O sebedisitse eng?  
(PLEASE MARK ALL THAT APPLY)

Seloetsi  Sesepe  Mathe  Vaseline  Oli ya Maseya  E nngwe

Kgweding e sa tswa feta na o sebedisitse ntho efe kapa efe ho pata hore o ne o le kgweding ha o etsa thobalano? Na o entse sena lekgetlo le leng le le leng ha o tswa madi, ha nngwe feela kapa ho hang?  
(IF NEVER, SKIP TO G40)

Lekgetlo le leng le le leng  Ka dinako tse ding  Ha nngwe  Ho hang

O sebedisitse eng?  
(PLEASE MARK ALL THAT APPLY)

Themphone  Sepontjhe sa ka Kitjhini  Lesela  Khothene Wulu  Pampiri ya Ntlwaneng  
 Khondomo ya Nacosa  E nngwe  Brown paper

---

**Please answer each of the following statements with never, once, a few times or often.**

Selemong se fetileng, na o rohakilwe, wa hlekefetswa le ho tshosetswa ka molomo ka lebaka la ho ba sex worker?

Ho hang  Ha nngwe  Makgetlo a Mmalwa  Kgafetsa

Selemong se fetileng na o ile wa otlwa kapa wa tshosetswa ka lebaka la ho ba sex worker?

Ho hang  Ha nngwe  Makgetlo a Mmalwa  Kgafetsa

Selemong se fetileng, na o ile wa ba le ketsahalo ya ho hlekefetswa ka thobalano ka lebaka la ho ba sex worker?

Ho hang  Ha nngwe  Makgetlo a Mmalwa  Kgafetsa

Selemong se fetileng, na ho na le motho ofe kapa ofe wa lelapa la heno (molekane, bana, bao o tswalanang le bona, jj) ya bileng le ketsahalo ya ho kgethollwa ka lebaka la hobane wena o le sex worker?

Ho hang  Ha nngwe  Makgetlo a Mmalwa  Kgafetsa

Selemong se fetileng, ke makgetlo a makae o qobellehileng ho fetola sebaka sa hao sa bodulo ka lebaka la ho ba sex worker?

Ho hang  Ha nngwe  Makgetlo a Mmalwa  Kgafetsa

Selemong se fetileng na o ile wa hanelwa ditshebeletso tsa bophelo hobane o le sex worker?

Ho hang  Ha nngwe  Makgetlo a Mmalwa  Kgafetsa

Selemong se fetileng, na o ile wa hanelwa thuso/ditshebeletso tsa sepolesa hobane o le sex worker?

Ho hang  Ha nngwe  Makgetlo a Mmalwa  Kgafetsa

---

**Please answer each of the following statements with strongly agree, agree, disagree or strongly disagree**



Selemong se fetileng, ke ikutlwile ke itshwabela hobane ke sex worker?

Ke Dumela Ke Tiile  Ke a Dumela  Ke a Hana  Ke Hana ke Tiile

Selemong se fetileng, ke ipone molato hobane ke sex worker?

Ke Dumela Ke Tiile  Ke a Dumela  Ke a Hana  Ke Hana ke Tiile

Selemong se fetileng, ke itshwaya phoso hobane ke sex worker?

Ke Dumela Ke Tiile  Ke a Dumela  Ke a Hana  Ke Hana ke Tiile

Selemong se fetileng, ke tshwaile ba bang diphoso hobane ke sex worker?

Ke Dumela Ke Tiile  Ke a Dumela  Ke a Hana  Ke Hana ke Tiile

Selemong se fetileng, ke ikutlwile eka ha ke bohlokwa ka ntho efe kapa efe hobane ke sex worker?

Ke Dumela Ke Tiile  Ke a Dumela  Ke a Hana  Ke Hana ke Tiile

Selemong se fetileng, ke ipone ke fuwa kotlo hobane ke sex worker?

Ke Dumela Ke Tiile  Ke a Dumela  Ke a Hana  Ke Hana ke Tiile

Selemong se fetileng ke utlwile eka nka ipolaya hobane ke sex worker?

Ke Dumela Ke Tiile  Ke a Dumela  Ke a Hana  Ke Hana ke Tiile

Selemong se fetileng, ke kgethile ho se ye phathing/dibesheng ka lebaka la ho ba sex worker?

Ke Dumela Ke Tiile  Ke a Dumela  Ke a Hana  Ke Hana ke Tiile

Selemong se fetileng ke ikgutse metswalleng le ho ba leloko ka lebaka la ho ba sex worker?

Ke Dumela Ke Tiile  Ke a Dumela  Ke a Hana  Ke Hana ke Tiile

Selemong se fetileng, ke entse qeto ya ho se (hlole ke) be le bana ka lebaka la ho ba sex worker?

Ke Dumela Ke Tiile  Ke a Dumela  Ke a Hana  Ke Hana ke Tiile

Selemong se fetileng, ke qobile ho ya tleneniking/sepetlele ka lebaka la ho ba sex worker?

Ke Dumela Ke Tiile  Ke a Dumela  Ke a Hana  Ke Hana ke Tiile

Selemong se fetileng, ke qobile ho ya sepoleseng ka lebaka la ho ba sex worker?

Ke Dumela Ke Tiile  Ke a Dumela  Ke a Hana  Ke Hana ke Tiile

Wagcina nini ukuya ocansini (olwesitho sangasese somuntu wesifazane/olwasendunu/olomlomo)?

---

Ngesikhathi sokugcina uya ocansini wayisebenzisa yini ikhondomu?  
(IF NO, SKIP TO 278)

Yebo  Cha

Wasebenzisa ikhondomu kumjikelezo ngamunye (umjikelezo uze ufike lapho echama khona/ekhipha khona isidoda)?

Yebo  Cha

Ubani oweza nekhondomu, kwakunguwe noma umlingani wakho?

- Mina uqobo  Umlingani  Kokubili

Kukhona kukukulandelayo owakuzwa ngekhondomu?

- Ukudabuka/Ukuqhuma Kwekhondomu  Ukumonyuka Kwekhondomu  Ikhondomu Lifakwe Uhhafu  
 Ikhondomu Lakhishwa Ngesikhathi Socansi  Akunazinkinga, Ikhondomu Lisebenza Kahle Kakhulu

Ngesikhathi sokugcina uya ocansini, wawulwenza nobani (umaqondana, umakhwaphezi, umcimbi noma owobusuku obubodwa ongakhokhi noma umlingani wesikhathi esedlule)?

- Umaqondana/Umlingani Wangempela/Umkipito  UMakhwaphezi  UMcimbi  Umlingani Wesikhathi  
 Esedlule  Okulalwe Naye Ubusuku Obubodwa

Uke wawasebenzisa amakhondomu noMAQONDANA enyangeni eyedlule? Ungasho yini ukuthi niwasebenzise njalo, kaningi noma ngezinye izikhathi?

- Awasetshenziswa  Njalo  Kani  Ngezinye izikhathi

Bangaki omaqondana oye nabo ocansini ngonyaka odlule?

\_\_\_\_\_

Bangaki omakhwaphezi oye nabo ocansini ngonyaka odlule?

\_\_\_\_\_

Bangaki oye nabo ocansini ubusuku obubodwa ngonyaka odlule?

\_\_\_\_\_

Onyakeni odlule kwenzeka kaningi kangakanani ukuthi udatshukelwe yikhondomu noma imonyuke iphume noma uyifaka uhhafu kuphela noma uyikhiphe bese uqhubeka nocansi?

- Izikhathi Zonke Lisetshenziswa  Kani  Ngezinye Izikhathi  Akaze Nhlobo  
 Akusetshenziswa

Ezinyangeni eziyi-6 ezedlule uke waba nazo nanoma yiziphi kulezi zimpawu ezilandelayo?  
 (IF NO SYMPTOMS EXPERIENCED, SKIP TO G14)

- Ubuhlungu noma Ukushisa Komchamo lapho Ngichama  Izilonda noma Amathumba Azungeze Isitho Sangasese  
 Isitho Sangasese Esilumayo  Okuphuma Esithweni Sangasese Okungajwayelekile  
 Ubuhlungu Ezansi Nesisu Sakho (Akuphathelene Nesikhathi Senyanga Noma Nokusebenzisa Iluphu)  
 Akukho kulezi Zimpawu

Wakuthola ukwelashelwa izimpawu osandukuzisho?

- Yebo  Cha

Wake waxilongwa watholakala unesifo esidluliswa ngocansi esifana negonoriya, i-syphilis, i-chlamydia, izinsumpa esithweni sokuzala, noma i-herpes ezithweni zokuzala?

- Yebo  Cha  Anginasiqiniseko  Walile Ukuphendula

Sicela ukhethe yonke eyemisebenzi yokusiza ehlukene eniyinikezayo

- Ukukhuluma noma Ubungane Nomuntu    Ukumasaja    Idina    Ukukhipha Ubisi Ebeleni  
 Ucansi Olwenziwa Ngocingo (Ukukhuluma)    Ucansi nge-Whatsapp/nge-Sms    Inthanethi/Emeyili/Ucansi  
 i nge-Inthanethi    Ucansi Lwesitho sangasese Sovesifazane    Ucansi Lwasendunu    Ucansi Lomlomo  
 Ukwenza Ngesandla    Ukukhumula noma Ukudansa    Ucansi Lweqembu    Okunye

Sicela ukhethe owodwa wemisebenzi yokusiza edume kakhulu kini (umcimbi omningi kakhulu oyicelayo)

- Ukukhuluma noma Ubungane Nomuntu    Ukumasaja    Idina    Ukukhipha Ubisi Ebeleni  
 Ucansi Olwenziwa Ngocingo (Ukukhuluma)    Ucansi nge-Whatsapp/nge-Sms    Inthanethi/Emeyili/Ucansi  
 i nge-Inthanethi    Ucansi Lwesitho sangasese Sovesifazane    Ucansi Lwasendunu    Ucansi Lomlomo  
 Ukwenza Ngesandla    Ukukhumula noma Ukudansa    Ucansi Lweqembu    Okunye

Esontweni eledlule, zingaki izinsuku owenze ngazo nomcimbi ucansi lomlomo, lwasendunu noma olwesitho sangasese somuntu wesifazane?

\_\_\_\_\_

Enyangeni edlule, zingaki izinsuku osebenze ngazo wenza nomcimbi ucansi lomlomo, lwasendunu noma olwesitho sangasese somuntu wesifazane?

\_\_\_\_\_  
(MUST BE MORE THAN PREVIOUS)

Mingaki imicimbi yesikhathi esisodwa owenze nayo ucansi ngoSUKU lokugcina lokusebenza?

\_\_\_\_\_

Mingaki imicimbi yesikhathi esisodwa owenze nayo ucansi ngeSONTO eledlule?

\_\_\_\_\_  
(MUST BE MORE THAN PREVIOUS)

Ngesikhathi sokugcina uya ocansini nomcimbi wesikhathi esisodwa wahamba nekhondomu yini?

- Ngaphandle Kwekhondomu    Ikhondomu Yowesilisa    Ikhondomu Yowesifazane  
 Ikhondomu Yowesilisa kanye neYowesifazane

Njalo uhamba nekhondomu nomcimbi wakho wesikhathi esisodwa?

- Izikhathi Zonke Lisetshenziswa    Kaningi    Ngezinye Izikhathi    Akaze Nhlobo  
 Akusetshenziswa

Bangaki abakho abavamile owenze nabo ucansi ngosuku lokugcina lokusebenza?

\_\_\_\_\_

Bangaki abakho abavamile owenze nabo ucansi ngesonto eledlule?

\_\_\_\_\_  
(MUST BE MORE THAN PREVIOUS)

Ngesikhathi sokugcina uya ocansini nomcimbi ovamile wahamba nekhondomu yini?

- Ngaphandle (Kwekhondomu)    Ikhondomu Yowesilisa    Ikhondomu Yowesifazane  
 Ikhondomu Yowesilisa kanye neYowesifazane

Ingabe kukhona yini isigameko lapho esontweni eledlule lapho kungaba uMcimbi ovamile noma owesikhathi esisodwa uhambe ngaphandle kwekhondomu ngenxa yananoma yisiphi isizathu lapho nanenza ucansi?

Yebo  Cha  Walile Ukuphendula

Njalo usebenza endaweni efanayo?

Yebo  Cha

Zingaki izindawo ezahlukene owenze kuzo umsebenzi wocansi ezinyangeni eziyi-6 ezedlule? (amathaveni ahlukene kanye namakhona ezitaladi ahlukene, njll.)

Wake wasebenza njenge-sex worker kwesinye isifundazwe eNingizimu Afrika

Yebo  Cha

Wake wasebenza njenge-sex worker kwelinye izwe, hhayi eNingizimu Afrika?

Yebo  Cha

Wakhokhelwa malini ngesikhathi sokugcina lapho wenza khona ucansi oluVamile (ngesitho sangasese sowesifazane)?

\_\_\_\_\_

(number)

Wathola malini ngosuku lokugcina owathengisa ngalo ucansi?

\_\_\_\_\_

(number)

Kwinyanga eyedlule ingaba buyimalini ubukhulu bemali oyenzile

\_\_\_\_\_

(number)

Enyangeni edlule makungekhobhinzi uthola malini

\_\_\_\_\_

(number)

Enyangeni eyedlule kukhona oyisebenzisile ukuthi womise, uhlanze noma uqinise isitho sakho sangasese ngaphambi kokuthi uye ocansini? Lokhu ukwenze ngaso sonke isikhathi, ngezinye izikhathi, kanye nje noma awukaze ukwenze nhlobo?

(IF NEVER, SKIP TO G36)

Ngezikhathi Zonke  Ngezinye izikhathi  Kanye  Neze nhlobo

Usebenziseni?

(PLEASE MARK ALL THAT APPLY)

Insipho  Amakhambi/Isinemfu  I-ayisi/Amanzi  Zamlandela/I-Tiger Balm  Wedwa Itshe  
 Iphepha Elinsundu  Amabhola Asezimayini  Okunye

Enyangeni eyedlule kukhona into oyisebenzisile ukuthambisa isitho sakho sangasese ngaphambi kokuthi uye ocansini? Lokhu ukwenze ngaso sonke isikhathi, ngezinye izikhathi, kanye nje noma awukaze ukwenze nhlobo? (IF NEVER, SKIP TO G38)

Ngezikhathi Zonke  Ngezinye izikhathi  Kanye  Neze nhlobo

Usebenziseni?  
(PLEASE MARK ALL THAT APPLY)

Isithambisi  Insipho  Amathe  uVaseline  i-Baby Oil  Okunye

Enyangeni eyedlule kukhona into oyisebenzisile ukuthi ufihle ukuthi bewopha/bewusesikhathini, ngesikhathi wenza ucansi? Lokhu ukwenze ngaso sonke isikhathi wopha, ngezinye izikhathi uma wopha, kanye nje noma awukaze ukwenze nhlobo? (IF NEVER, SKIP TO G40)

Ngezikhathi Zonke  Ngezinye izikhathi  Kanye  Neze nhlobo

Usebenziseni?  
(PLEASE MARK ALL THAT APPLY)

iTampon  Isipontshi Sasekhishini  Indwangu  i-Cotton Wool  Iphepha Lasethoyilethi  
 I-Nacosa Khondomu  Brown paper  Okunye

---

**Please answer each of the following statements with never, once, a few times or often.**

Onyakeni odlule, uke wethukwa ngomlomo, wahlushwa noma wesatshiswa ngenxa yokuba yi-sex worker?

Neze nhlobo  Kanye  Izikhathi Ezimbalwa  Kaningi

Onyakeni odlule, uke washaywa noma wesatshiswa ngenxa yokuba yi-sex worker?

Neze nhlobo  Kanye  Izikhathi Ezimbalwa  Kaningi

Onyakeni odlule, uke wahlukunyezwa ngokocansi ngenxa yokuba yi-sex worker?

Neze nhlobo  Kanye  Izikhathi Ezimbalwa  Kaningi

Onyakeni odlule, ukhona yini owomndeni wakho (umlingani, izingane, ozalwa nabo, njll) oke wabandlululwa ngenxa yokuba kwakho yi-sex worker?

Neze nhlobo  Kanye  Izikhathi Ezimbalwa  Kaningi

Onyakeni odlule, kukaningi kangakanani uphoqwa ukuba ushintshe indawo yakho ohlala kuyo ngenxa yokuba yi-sex worker?

Neze nhlobo  Kanye  Izikhathi Ezimbalwa  Kaningi

Onyakeni odlule, uke wancishwa kangaki izinsizakalo zezempilo ngoba uyi-sex worker?

Neze nhlobo  Kanye  Izikhathi Ezimbalwa  Kaningi

Onyakeni odlule, uke walelwa yini usizo izinsizakalo zamaphoyisa ngoba uyi-sex worker?

Neze nhlobo  Kanye  Izikhathi Ezimbalwa  Kaningi

---



---

**Please answer each of the following statements with strongly agree, agree, disagree or strongly disagree**

Onyakeni odlule, ngizizwe nginamahlobni ngoba ngiyi-sex worker?

- Ngiyavuma Kakhulu    Ngiyavuma    Angivumi    Angivumi Kakhulu

Onyakeni odlule, ngizizwe nginecala ngoba ngiyi-sex worker?

- Ngiyavuma Kakhulu    Ngiyavuma    Angivumi    Angivumi Kakhulu

Onyakeni odlule, ngizisolile ngoba ngiyi-sex worker?

- Ngiyavuma Kakhulu    Ngiyavuma    Angivumi    Angivumi Kakhulu

Onyakeni odlule, ngisole abanye ngoba ngiyi-sex worker?

- Ngiyavuma Kakhulu    Ngiyavuma    Angivumi    Angivumi Kakhulu

Onyakeni odlule, ngizizwe ukuthi angifanelwe yilutho ngoba ngiyi-sex worker?

- Ngiyavuma Kakhulu    Ngiyavuma    Angivumi    Angivumi Kakhulu

Onyakeni odlule, ngizizwe ngijeziswa ngoba ngiyi-sex worker?

- Ngiyavuma Kakhulu    Ngiyavuma    Angivumi    Angivumi Kakhulu

Onyakeni odlule, ngizizwe ngifuna ukuzibulala ngoba ngiyi-sex worker?

- Ngiyavuma Kakhulu    Ngiyavuma    Angivumi    Angivumi Kakhulu

Onyakeni odlule, uke ngikhethhe ukungayi eMihlanganweni Yomphakathi ngenxa yokuba yi-sex worker?

- Ngiyavuma Kakhulu    Ngiyavuma    Angivumi    Angivumi Kakhulu

Onyakeni odlule, ngizahlukanisile kubangane nomndeni ngenxa yokuba yi-sex worker?

- Ngiyavuma Kakhulu    Ngiyavuma    Angivumi    Angivumi Kakhulu

Onyakeni odlule, ngingume ukuthi ngingabi (nezihlobo) ngenxa yokuba yi-sex worker?

- Ngiyavuma Kakhulu  
 Ngiyavuma  
 Angivumi  
 Angivumi Kakhulu

Onyakeni odlule, ngikugwemile ukuya emtholampilo/esibhedlela ngenxa yokuba yi-sex worker?

- Ngiyavuma Kakhulu  
 Ngiyavuma  
 Angivumi  
 Angivumi Kakhulu

Onyakeni odlule, ngikugwemile ukuya emaphoyiseni ngenxa yokuba yi-sex worker?

- Ngiyavuma Kakhulu  
 Ngiyavuma  
 Angivumi  
 Angivumi Kakhulu

# Mental Health

---

---

**I would like to ask you some questions about how you have been feeling in the past week. I am going to read out some statements and ask you to say how many days you have had particular feelings or ideas or whether you have not had them at all.**

During the past week I was worried by things that usually don't worry me

- Rarely Or None Of The Time (2-4 Days)    Some Of A Little Of The Time (1-2Days)    A Moderate Amount Of Time (2-4 Days)    Most Of The Time (5-7Days)

During the past week I did not feel like eating, my appetite was poor

- Rarely Or None Of The Time (2-4 Days)    Some Of A Little Of The Time (1-2Days)    A Moderate Amount Of Time (2-4 Days)    Most Of The Time (5-7Days)

During the past week I felt I could not make myself feel happy even with the help of family and friends

- Rarely Or None Of The Time (2-4 Days)    Some Of A Little Of The Time (1-2Days)    A Moderate Amount Of Time (2-4 Days)    Most Of The Time (5-7Days)

During the past week I felt I was just as good as other people

- Rarely Or None Of The Time (2-4 Days)    Some Of A Little Of The Time (1-2Days)    A Moderate Amount Of Time (2-4 Days)    Most Of The Time (5-7Days)

During the past week I had trouble keeping my mind on what I was doing

- Rarely Or None Of The Time (2-4 Days)    Some Of A Little Of The Time (1-2Days)    A Moderate Amount Of Time (2-4 Days)    Most Of The Time (5-7Days)

During the past week I felt depressed (very sad all of the time)

- Rarely Or None Of The Time (2-4 Days)    Some Of A Little Of The Time (1-2Days)    A Moderate Amount Of Time (2-4 Days)    Most Of The Time (5-7Days)

During the past week I felt that everything I did was an effort

- Rarely Or None Of The Time (2-4 Days)    Some Of A Little Of The Time (1-2Days)    A Moderate Amount Of Time (2-4 Days)    Most Of The Time (5-7Days)

During the past week I felt hopeful about the future

- Rarely Or None Of The Time (2-4 Days)    Some Of A Little Of The Time (1-2Days)    A Moderate Amount Of Time (2-4 Days)    Most Of The Time (5-7Days)

During the past week I thought my life had been a failure

- Rarely Or None Of The Time (2-4 Days)    Some Of A Little Of The Time (1-2Days)    A Moderate Amount Of Time (2-4 Days)    Most Of The Time (5-7Days)

During the past week I felt fearful

- Rarely Or None Of The Time (2-4 Days)    Some Of A Little Of The Time (1-2Days)    A Moderate Amount Of Time (2-4 Days)    Most Of The Time (5-7Days)

During the past week my sleep was restless (woke up in the night/did not sleep well/had trouble falling asleep)

- Rarely Or None Of The Time    Some Of A Little Of The Time (1-2Days)    A Moderate Amount Of Time (2-4 Days)    Most Of The Time (5-7Days)

During the past week I was happy

- Rarely Or None Of The Time    Some Of A Little Of The Time (1-2Days)    A Moderate Amount Of Time (2-4 Days)    Most Of The Time (5-7Days)

During the past week I talked less than usual

- Rarely Or None Of The Time    Some Of A Little Of The Time (1-2Days)    A Moderate Amount Of Time (2-4 Days)    Most Of The Time (5-7Days)

During the past week I felt lonely

- Rarely Or None Of The Time    Some Of A Little Of The Time (1-2Days)    A Moderate Amount Of Time (2-4 Days)    Most Of The Time (5-7Days)

During the past week people were unfriendly

- Rarely Or None Of The Time    Some Of A Little Of The Time (1-2Days)    A Moderate Amount Of Time (2-4 Days)    Most Of The Time (5-7Days)

During the past week I enjoyed life

- Rarely Or None Of The Time    Some Of A Little Of The Time (1-2Days)    A Moderate Amount Of Time (2-4 Days)    Most Of The Time (5-7Days)

During the past week I cried a lot

- Rarely Or None Of The Time    Some Of A Little Of The Time (1-2Days)    A Moderate Amount Of Time (2-4 Days)    Most Of The Time (5-7Days)

During the past week I felt sick

- Rarely Or None Of The Time    Some Of A Little Of The Time (1-2Days)    A Moderate Amount Of Time (2-4 Days)    Most Of The Time (5-7Days)

During the past week I felt that people dislike me

- Rarely Or None Of The Time    Some Of A Little Of The Time (1-2Days)    A Moderate Amount Of Time (2-4 Days)    Most Of The Time (5-7Days)

During the past week I could not get 'going'

- Rarely Or None Of The Time    Some Of A Little Of The Time (1-2Days)    A Moderate Amount Of Time (2-4 Days)    Most Of The Time (5-7Days)

During the past week I have been thinking too much

- Rarely Or None Of The Time    Some Of A Little Of The Time (1-2Days)    A Moderate Amount Of Time (2-4 Days)    Most Of The Time (5-7Days)

During the past week my heart has been painful

- Rarely Or None Of The Time    Some Of A Little Of The Time (1-2Days)    A Moderate Amount Of Time (2-4 Days)    Most Of The Time (5-7Days)



During the past week my spirit has been low

- Rarely Or None Of The Time    Some Of A Little Of The Time (1-2Days)    A Moderate Amount Of Time (2-4 Days)    Most Of The Time (5-7Days)

Now I want to ask you a question about the past month (four weeks), Has the thought of ending your life been in your mind?

- No    Yes

---

---

**The following are symptoms that people sometimes experience after having a terrible event happen in their lives. I'll read each one, please state how much the symptom has bothered you in the past week**

Recurrent thoughts or memories of the event

- Not At All    Rarely    Sometimes    Most Of The Time

Feelings as though the event is happening again

- Not At All    Rarely    Sometimes    Most Of The Time

Recurrent nightmares about the event

- Not At All    Rarely    Sometimes    Most Of The Time

Sudden emotional or physical reactions when reminded of the event

- Not At All    Rarely    Sometimes    Most Of The Time

Avoiding activities that remind you of the event

- Not At All    Rarely    Sometimes    Most Of The Time

Avoiding thoughts or feelings associated with the event, so I try not to feel or think about anything that reminds me of it

- Not At All    Rarely    Sometimes    Most Of The Time

Feeling jumpy, get a fright easily

- Not At All    Rarely    Sometimes    Most Of The Time

Feeling on guard, ready to fight to protect yourself

- Not At All    Rarely    Sometimes    Most Of The Time

In the past year, have you cut, burned or hurt yourself on purpose

- Yes    No

In the past year, have you attempted suicide?

- Yes    No

**I would like to ask you some questions about how you have been feeling in the past week. I am going to read out some statements and ask you to say how many days you have had particular feelings or ideas or whether you have not had them at all.**

Bekeng e fetileng ke ne ke tshwengwa ke dintho tse sa ntshwenyeng ka mehla

- Ha se ha ngata Kapa Ha ho aetsahala    Nakonyana e itseng (Letsatsi le le 1-2)    Nako e Lekaneng (Matsatsi a 2-4)    Boholo ba Nako (Matsatsi a 5-7)

Bekeng e fetileng ke ne ke sa ikutlwe ho ja, ke se na takatso ya dijo

- Ha se ha ngata Kapa Ha ho aetsahala    Nakonyana e itseng (Letsatsi le le 1-2)    Nako e Lekaneng (Matsatsi a 2-4)    Boholo ba Nako (Matsatsi a 5-7)

Bekeng e fetileng ke ikutlwile ke sa kgone ho thaba le ka thuso ya ba lelapa le metswalle

- Ha se ha ngata Kapa Ha ho aetsahala    Nakonyana e itseng (Letsatsi le le 1-2)    Nako e Lekaneng (Matsatsi a 2-4)    Boholo ba Nako (Matsatsi a 5-7)

Bekeng e fetileng ke ikutlwile ke lokile jwalo ka batho ba bang

- Ha se ha ngata Kapa Ha ho aetsahala    Nakonyana e itseng (Letsatsi le le 1-2)    Nako e Lekaneng (Matsatsi a 2-4)    Boholo ba Nako (Matsatsi a 5-7)

Bekeng e fetileng ke bile le bothata ba ho tsepamisa monahano wa ka ho seo ke neng ke se etsa

- Ha se ha ngata Kapa Ha ho aetsahala    Nakonyana e itseng (Letsatsi le le 1-2)    Nako e Lekaneng (Matsatsi a 2-4)    Boholo ba Nako (Matsatsi a 5-7)

Bekeng e fetileng ke ikutlwile ke sithabetse maikutlo (ke hloname nako kaofela)

- Ha se ha ngata Kapa Ha ho aetsahala    Nakonyana e itseng (Letsatsi le le 1-2)    Nako e Lekaneng (Matsatsi a 2-4)    Boholo ba Nako (Matsatsi a 5-7)

Bekeng e fetileng ke utlwile eka ntho e nngwe le e nngwe eo ke e etsang e ne e le ho leka

- Ha se ha ngata Kapa Ha ho aetsahala    Nakonyana e itseng (Letsatsi le le 1-2)    Nako e Lekaneng (Matsatsi a 2-4)    Boholo ba Nako (Matsatsi a 5-7)

Bekeng e fetileng ke ikutlwile ke na le tshepo bokamosong

- Ha se ha ngata Kapa Ha ho aetsahala    Nakonyana e itseng (Letsatsi le le 1-2)    Nako e Lekaneng (Matsatsi a 2-4)    Boholo ba Nako (Matsatsi a 5-7)

Bekeng e fetileng ke ne ke nahana hore bophelo ba ka ha bo a atleha

- Ha se ha ngata Kapa Ha ho aetsahala    Nakonyana e itseng (Letsatsi le le 1-2)    Nako e Lekaneng (Matsatsi a 2-4)    Boholo ba Nako (Matsatsi a 5-7)

Bekeng e fetileng ke ikutlwile ke na le letswalo

- Ha se ha ngata Kapa Ha ho aetsahala    Nakonyana e itseng (Letsatsi le le 1-2)    Nako e Lekaneng (Matsatsi a 2-4)    Boholo ba Nako (Matsatsi a 5-7)

Bekeng e fetileng ke ne ke hlobaela (ke tsoha bosiu/ke sa robale hantle/ ke na le bothata ba ho tlelwa ke boroko

- Ha se ha ngata Kapa Ha ho aetsahala    Nakonyana e itseng (Letsatsi le le 1-2)    Nako e Lekaneng (Matsatsi a 2-4)    Boholo ba Nako (Matsatsi a 5-7)

Bekeng e fetileng ke ne ke thabile

- Ha se ha ngata Kapa Ha ho aetsahala  Nakonyana e itseng (Letsatsi le le 1-2)  Nako e Lekaneng (Matsatsi a 2-4)  Boholo ba Nako (Matsatsi a 5-7)

Bekeng e fetileng ke buile ha nyane ho feta ka tlwaelo

- Ha se ha ngata Kapa Ha ho aetsahala  Nakonyana e itseng (Letsatsi le le 1-2)  Nako e Lekaneng (Matsatsi a 2-4)  Boholo ba Nako (Matsatsi a 5-7)

Bekeng e fetileng ke ikutlwile eka ke mong

- Ha se ha ngata Kapa Ha ho aetsahala  Nakonyana e itseng (Letsatsi le le 1-2)  Nako e Lekaneng (Matsatsi a 2-4)  Boholo ba Nako (Matsatsi a 5-7)

Bekeng e fetileng batho ba ne ba se mosa

- Ha se ha ngata Kapa Ha ho aetsahala  Nakonyana e itseng (Letsatsi le le 1-2)  Nako e Lekaneng (Matsatsi a 2-4)  Boholo ba Nako (Matsatsi a 5-7)

Bekeng e fetileng ke natefetswe ke bophelo

- Ha se ha ngata Kapa Ha ho aetsahala  Nakonyana e itseng (Letsatsi le le 1-2)  Nako e Lekaneng (Matsatsi a 2-4)  Boholo ba Nako (Matsatsi a 5-7)

Bekeng e fetileng ke llile haholo

- Ha se ha ngata Kapa Ha ho aetsahala  Nakonyana e itseng (Letsatsi le le 1-2)  Nako e Lekaneng (Matsatsi a 2-4)  Boholo ba Nako (Matsatsi a 5-7)

Bekeng e fetileng ke ikutlwile ke sa phela hantle

- Ha se ha ngata Kapa Ha ho aetsahala  Nakonyana e itseng (Letsatsi le le 1-2)  Nako e Lekaneng (Matsatsi a 2-4)  Boholo ba Nako (Matsatsi a 5-7)

Bekeng e fetileng ke ikutlwile eka batho ha ba nthate

- Ha se ha ngata Kapa Ha ho aetsahala  Nakonyana e itseng (Letsatsi le le 1-2)  Nako e Lekaneng (Matsatsi a 2-4)  Boholo ba Nako (Matsatsi a 5-7)

Bekeng e fetileng ke ne ke sa kgone ho etsa letho

- Ha se ha ngata Kapa Ha ho aetsahala  Nakonyana e itseng (Letsatsi le le 1-2)  Nako e Lekaneng (Matsatsi a 2-4)  Boholo ba Nako (Matsatsi a 5-7)

Bekeng e fetileng ke ne ke nahana haholo

- Ha se ha ngata Kapa Ha ho aetsahala  Nakonyana e itseng (Letsatsi le le 1-2)  Nako e Lekaneng (Matsatsi a 2-4)  Boholo ba Nako (Matsatsi a 5-7)

Bekeng e fetileng pelo ya ka e ne e le bohloko

- Ha se ha ngata Kapa Ha ho aetsahala  Nakonyana e itseng (Letsatsi le le 1-2)  Nako e Lekaneng (Matsatsi a 2-4)  Boholo ba Nako (Matsatsi a 5-7)

Bekeng e fetileng moya wa ka o ne o le tlase

- Ha se ha ngata Kapa Ha ho aetsahala  Nakonyana e itseng (Letsatsi le le 1-2)  Nako e Lekaneng (Matsatsi a 2-4)  Boholo ba Nako (Matsatsi a 5-7)

Jwale ke batla ho o botsa potso ka kgwedi e fetileng (dibeke tse nne), Na o bile le monahano wa ho ipolaya?

- Tjhe  E

---

**The following are symptoms that people sometimes experience after having a terrible event happen in their lives. I'll read each one, please state how much the symptom has bothered you in the past week**

Menahano e ipoeletsang kapa sehopotso sa ketsahalo

- Ho hang  Ha se ha ngata  Ka dinako tse ding  Boholo ba Nako

Ho ikutlwa eka ketsahalo e etsahala hape

- Ho hang  Ha se ha ngata  Ka dinako tse ding  Boholo ba Nako

Ditoro tse hloabaetsang ka ketsahalo

- Ho hang  Ha se ha ngata  Ka dinako tse ding  Boholo ba Nako

Diketso tse seng di bonahala tsa maikutlo kapa mmeleng ha o hopotswa ka ketsahalo

- Ho hang  Ha se ha ngata  Ka dinako tse ding  Boholo ba Nako

Qoba diketso tse o hopotsang ka ketsahalo

- Ho hang  Ha se ha ngata  Ka dinako tse ding  Boholo ba Nako

Ho qoba menahano kapa maikutlo a amanang le ketsahalo, ka hoo ke leka ho se utlwe kapa ho se nahane ka ntho efe kapa efe e nkgopotsang ka yona

- Ho hang  Ha se ha ngata  Ka dinako tse ding  Boholo ba Nako

Ho se dudisehe, ho tshoha habonolo

- Ho hang  Ha se ha ngata  Ka dinako tse ding  Boholo ba Nako

Ho ikutlwa o dula o lalletse, o loketse ho lwana ho itshireletsa

- Ho hang  Ha se ha ngata  Ka dinako tse ding  Boholo ba Nako

Selemong se fetileng, na o ile wa itsheha, wa itjhesa kapa wa ikutlwisa bohloko ka boomo?

- E  Tjhe

Selemong se fetileng, na o ile wa leka ho ipolaya?

- E  Tjhe

**I would like to ask you some questions about how you have been feeling in the past week. I am going to read out some statements and ask you to say how many days you have had particular feelings or ideas or whether you have not had them at all.**

Ngesonto eledlule bengikhathazwa yizinto ezingangikhathazi ngokuvamile

- Akujwayele Noma Asikho Isikhathi    Esinye Sesikhathi Esincane (1-2 Izinsuku)    Inani Lesikhathi Elikahle (2-4 Izinsuku)    Isikhathi Esiningi Kakhulu (5-7 Izinsuku)

Ngesonto eledlule bengingathandi ukudla, uthando lwami lokudla belulubi

- Akujwayele Noma Asikho Isikhathi    Esinye Sesikhathi Esincane (1-2 Izinsuku)    Inani Lesikhathi Elikahle (2-4 Izinsuku)    Isikhathi Esiningi Kakhulu (5-7 Izinsuku)

Ngesonto eledlule ngizizwe ngingakwazi ukuzijabulisa ngisho nangosizo lomndeni nabangane

- Akujwayele Noma Asikho Isikhathi    Esinye Sesikhathi Esincane (1-2 Izinsuku)    Inani Lesikhathi Elikahle (2-4 Izinsuku)    Isikhathi Esiningi Kakhulu (5-7 Izinsuku)

Ngesonto eledlule ngizizwe sengathi bengilungile njengabanye abantu

- Akujwayele Noma Asikho Isikhathi  
 Esinye Sesikhathi Esincane (1-2 Izinsuku)  
 Inani Lesikhathi Elikahle (2-4 Izinsuku)  
 Isikhathi Esiningi Kakhulu (5-7 Izinsuku)

Ngesonto eledlule ngibe nenkinga yokugcina umqondo wami kulokhu engangikwenza

- Akujwayele Noma Asikho Isikhathi  
 Esinye Sesikhathi Esincane (1-2 Izinsuku)  
 Inani Lesikhathi Elikahle (2-4 Izinsuku)  
 Isikhathi Esiningi Kakhulu (5-7 Izinsuku)

Ngesonto eledule ngazizwa ngidangele (ngidumele kakhulu ngaso sonke isikhathi)

- Akujwayele Noma Asikho Isikhathi  
 Esinye Sesikhathi Esincane (1-2 Izinsuku)  
 Inani Lesikhathi Elikahle (2-4 Izinsuku)  
 Isikhathi Esiningi Kakhulu (5-7 Izinsuku)

Ngesonto eledlule ngazizwa sengathi yonke into engangiyenza kwakuwukuzama okukhulu

- Akujwayele Noma Asikho Isikhathi    Esinye Sesikhathi Esincane (1-2 Izinsuku)    Inani Lesikhathi Elikahle (2-4 Izinsuku)    Isikhathi Esiningi Kakhulu (5-7 Izinsuku)

Ngesonto eledlule ngazizwa nginethemba ngekusasa

- Akujwayele Noma Asikho Isikhathi    Esinye Sesikhathi Esincane (1-2 Izinsuku)    Inani Lesikhathi Elikahle (2-4 Izinsuku)    Isikhathi Esiningi Kakhulu (5-7 Izinsuku)

Ngesonto eledlule ngacabanga ukuthi ngangehlulekile empilweni yami

- Akujwayele Noma Asikho Isikhathi    Esinye Sesikhathi Esincane (1-2 Izinsuku)    Inani Lesikhathi Elikahle (2-4 Izinsuku)    Isikhathi Esiningi Kakhulu (5-7 Izinsuku)

Ngesonto eledlule ngazizwa ngesaba

- Akujwayele Noma Asikho Isikhathi  
 Esinye Sesikhathi Esincane (1-2 Izinsuku)  
 Inani Lesikhathi Elikahle (2-4 Izinsuku)  
 Isikhathi Esiningi Kakhulu (5-7 Izinsuku)

Ngesonto eledlule ngangingalele kahle (ngavuka ebusuku/angilalanga kahle/ngaba nenkinga yokuzumeka)

- Akujwayele Noma Asikho Isikhathi  
 Esinye Sesikhathi Esincane (1-2 Izinsuku)  
 Inani Lesikhathi Elikahle (2-4 Izinsuku)  
 Isikhathi Esiningi Kakhulu (5-7 Izinsuku)

Ngesonto eledlule ngangijabule

- Akujwayele Noma Asikho Isikhathi  
 Esinye Sesikhathi Esincane (1-2 Izinsuku)  
 Inani Lesikhathi Elikahle (2-4 Izinsuku)  
 Isikhathi Esiningi Kakhulu (5-7 Izinsuku)

Ngesonto eledlule ngakhuluma kancane kunokwejwayelekile

- Akujwayele Noma Asikho Isikhathi (2-4 Izinsuku)    Esinye Sesikhathi Esincane (1-2 Izinsuku)    Inani Lesikhathi Elikahle (2-4 Izinsuku)  
 Isikhathi Esiningi Kakhulu (5-7 Izinsuku)

Ngesonto eledlule ngazizwa ngingedwa

- Akujwayele Noma Asikho Isikhathi (2-4 Izinsuku)    Esinye Sesikhathi Esincane (1-2 Izinsuku)    Inani Lesikhathi Elikahle (2-4 Izinsuku)  
 Isikhathi Esiningi Kakhulu (5-7 Izinsuku)

Ngesonto eledlule abantu babengenabo ubungane

- Akujwayele Noma Asikho Isikhathi (2-4 Izinsuku)    Esinye Sesikhathi Esincane (1-2 Izinsuku)    Inani Lesikhathi Elikahle (2-4 Izinsuku)  
 Isikhathi Esiningi Kakhulu (5-7 Izinsuku)

Ngesonto eledlule ngayithokozela impilo

- Akujwayele Noma Asikho Isikhathi (2-4 Izinsuku)    Esinye Sesikhathi Esincane (1-2 Izinsuku)    Inani Lesikhathi Elikahle (2-4 Izinsuku)  
 Isikhathi Esiningi Kakhulu (5-7 Izinsuku)

Ngesonto eledlule ngikhale kakhulu

- Akujwayele Noma Asikho Isikhathi (2-4 Izinsuku)    Esinye Sesikhathi Esincane (1-2 Izinsuku)    Inani Lesikhathi Elikahle (2-4 Izinsuku)  
 Isikhathi Esiningi Kakhulu (5-7 Izinsuku)

Ngesonto eledlule ngazizwa ngigula

- Akujwayele Noma Asikho Isikhathi (2-4 Izinsuku)    Esinye Sesikhathi Esincane (1-2 Izinsuku)    Inani Lesikhathi Elikahle (2-4 Izinsuku)  
 Isikhathi Esiningi Kakhulu (5-7 Izinsuku)

Ngesonto eledlule ngezwa ukuthi abantu abangithandi

- Akujwayele Noma Asikho Isikhathi (2-4 Izinsuku)    Esinye Sesikhathi Esincane (1-2 Izinsuku)    Inani Lesikhathi Elikahle (2-4 Izinsuku)  
 Isikhathi Esiningi Kakhulu (5-7 Izinsuku)

Ngesonto eledlule angikwazanga 'ukuqhubeka'

- Akujwayele Noma Asikho Isikhathi (2-4 Izinsuku)    Esinye Sesikhathi Esincane (1-2 Izinsuku)    Inani Lesikhathi Elikahle (2-4 Izinsuku)  
 Isikhathi Esiningi Kakhulu (5-7 Izinsuku)

Ngesonto eledlule bengicabanga kakhulu

- Akujwayele Noma Asikho Isikhathi (2-4 Izinsuku)    Esinye Sesikhathi Esincane (1-2 Izinsuku)    Inani Lesikhathi Elikahle (2-4 Izinsuku)  
 Isikhathi Esiningi Kakhulu (5-7 Izinsuku)

Ngesonto eledlule inhliziyo yami beyibuhlungu

- Akujwayele Noma Asikho Isikhathi (2-4 Izinsuku)    Esinye Sesikhathi Esincane (1-2 Izinsuku)    Inani Lesikhathi Elikahle (2-4 Izinsuku)  
 Isikhathi Esiningi Kakhulu (5-7 Izinsuku)

Ngesonto eledlule umoya wami bewuphansi

- Akujwayele Noma Asikho Isikhathi (2-4 Izinsuku)    Esinye Sesikhathi Esincane (1-2 Izinsuku)    Inani Lesikhathi Elikahle (2-4 Izinsuku)  
 Isikhathi Esiningi Kakhulu (5-7 Izinsuku)

Manje ngifuna ukukubuzisa umbuzo mayelana nenyanga edlule (amasonto amane), Ingabe umcabango wokuzibulala bewusengqondweni yakho?

Cha  Yebo

---

**The following are symptoms that people sometimes experience after having a terrible event happen in their lives. I'll read each one, please state how much the symptom has bothered you in the past week**

Ukubuyelela kwemicabango noma izinkumbulo zesigameko

Lutho nhlobo  Akujwayele  Ngezinye izikhathi  Izikhathi Eziningi Kakhulu

Kuzwakala sengathi isehlakalo siyenzeka futhi

Lutho nhlobo  Akujwayele  Ngezinye izikhathi  Izikhathi Eziningi Kakhulu

Amaphupho amabi abuyelelayo maqondana nesehlakalo

Lutho nhlobo  Akujwayele  Ngezinye izikhathi  Izikhathi Eziningi Kakhulu

Ukuzwela kwemizwa noma okomzimba okusheshayo uma ngikhunjuzwa ngesigameko

Lutho nhlobo  Akujwayele  Ngezinye izikhathi  Izikhathi Eziningi Kakhulu

Ukugwema imisebenzi ekukhumbuzisa ngesigameko

Lutho nhlobo  Akujwayele  Ngezinye izikhathi  Izikhathi Eziningi Kakhulu

Ukugwema imicabango noma imizwa ehambisana nesigameko, ngizama ukuthi ngingezwa noma ngingacabangi nganoma iyiphi into engikhumbuzisa sona

Lutho nhlobo  Akujwayele  Ngezinye izikhathi  Izikhathi Eziningi Kakhulu

Ukuzizwa wethuka, wesaba kalula

Lutho nhlobo  Akujwayele  Ngezinye izikhathi  Izikhathi Eziningi Kakhulu

Ukuzizwa uhlala uqaphile, ukulungele ukulwa ukuze uzivikele wena uqobo

Lutho nhlobo  Akujwayele  Ngezinye izikhathi  Izikhathi Eziningi Kakhulu

Esikhathini esedlule, uke wazisika, wazishisa noma wazilimaza wena uqobo ngenhloso?

Yebo  Cha

Ngonyaka owedlule, uke wazama ukuzibulala?

Yebo  Cha

# Audit

How often do you have a drink containing alcohol?

- Never  Monthly Or Less  2-4Times Per Month  2-3 Times Per Week  4+ Times Per Week

How many drinks containing alcohol do you have on a typical day when you are drinking?

- 0  1 Or 2  3 Or 4  5 Or 6  7 Or 9  10 Or More

How much is a typical drink (one drink, a beer or a glass of wine etc)

- no drink  250 mls or less (Small Beer or 1 glass of wine)  440mls  500mls  
 750 mls (Bumpie)  1 Litre  2 Litres  5 Litres (Big Box Wine)

How often do you have six or more drinks on one occasion?

- Never  Less Than Monthly  Monthly  Weekly  Daily Or Almost Daily

Within the past year how often have you taken dagga  
 (PLEASE SELECT ALL THAT APPLY)

- never  once  sometimes  often

Within the past year how often have you taken Ndanda or mandrax

- never  once  sometimes  often

Within the past year how often have you taken Nyaopi or whoonga

- never  once  sometimes  often

Within the past year how often have you taken cough mixture when not sick

- never  once  sometimes  often

Within the past year how often have you taken pain killers when not ill

- never  once  sometimes  often

Within the past year how often have you taken Mg (Ecstasy)

- never  once  sometimes  often

Within the past year how often have you taken Njumpi (Crystal Meth/Tik|

- never  once  sometimes  often

Within the past year how often have you taken Glass/Rock

- never  once  sometimes  often

O nwa seno se nang le jwala ha kae?

- Ho hang  Kgwedi le Kgwedi kapa Ka tlase ho moo  Makgetlo a 2-4 ka Kgwedi  Makgetlo a 2-3 ka Beke  Makgetlo a 4+ ka Beke



Ke dino tse kae tse nang le jwala tseo o di nwang ka letsatsi?

- 0  1 kapa 2  3 kapa 4  5 kapa 6  7 kapa 9  10 kapa ho feta

Seno se tlwaelehileng ke se se kae (seno se le seng, biya kapa kgalase ya waene, jj)

- no drink  250 mls kapa ka tlase (Biya e Nyane kapa kgalase e le 1 ya waene)  440mls  
 500mls  750 mls (Bumpie)  Litara e le 1  Dilitara tse 2  Dilitara tse 5 (Waene ya Lebokose le Leholo)

Ke ka makgetlo a makae o nwang dino tse tsheletseng kapa ho feta ketsahalong e le nngwe?

- Ho hang  Ka tlase ho Kgwedi le Kgwedi  Kgwedi le Kgwedi  Beke le Beke  Letsatsi le Letsatsi  
kapa Nako e ka bang Letsatsi le Letsatsi

Selemong se fetileng, o tsubile matekwane ha kae?

(PLEASE SELECT ALL THAT APPLY)

- ho hang  ha nngwe  ka dinako tse ding  kgafetsa

Selemong se fetileng, o tsubile Ndanda kapa mendrekse ha kae?

- ho hang  ha nngwe  ka dinako tse ding  kgafetsa

Selemong se fetileng o tsubile Nyaope kapa whoonga ha kae?

- ho hang  ha nngwe  ka dinako tse ding  kgafetsa

Selemong se fetileng, o nwele moriana wa ho kgohlala ha kae o sa kule?

- ho hang  ha nngwe  ka dinako tse ding  kgafetsa

Selemong se fetileng, o nwele difodisamahlaba ha kae o sa kule?

- ho hang  ha nngwe  ka dinako tse ding  kgafetsa

Selemong se fetileng, o tsubile Mg (Ecstasy) ha kae?

- ho hang  ha nngwe  ka dinako tse ding  kgafetsa

Selemong se fetileng, o tsubile Njumpi (Crystal Meth/Tiki) ha kae?

- ho hang  ha nngwe  ka dinako tse ding  kgafetsa

Selemong se fetileng, o tsubile Glass/Rock ha kae?

- ho hang  ha nngwe  ka dinako tse ding  kgafetsa

Usiphuza kaningi kangakanani isiphuzo esinotshwala?

- Neze nhlobo  Ngenyanga Noma Ngaphansi  2-4Izikhathi Ngenyanga  2-3 Izikhathi Ngesonto  
 4+ Izikhathi Ngesonto

Uphuza iziphuzo ezingaki ezinotshwala ngelanga elejwayelekile uma uphuza?

- 0  1 Noma 2  3 Noma 4  5 Noma 6  7 Noma 9  10 Noma Ngaphezulu

Isiphuzo esijwayelekile singakanani (isiphuzo esisodwa, ubhiya noma ingilazi yewayini, njll.)?

- no drink    250 mls noma ngaphansi (Ubhiya Omncane noma 1 ingilazi yewayini)    440mls  
 500mls    750 mls (Bumpie)    1 Litha    2 amaLitha    5 amaLitha (Ibhokisi Elikhulu Lewayini)

Kukaningi kangakanani lapho ophuza khona iziphuzo eziyisithupha noma ngaphezulu ngesikhathi esisodwa?

- Neze nhlobo    Ngaphansi KwangeNyanga    Ngenyanga    Ngesonto    Nsuku zonke Noma Cishe Nsuku Zonke

Onyakeni odlule, uyibheme kani kanganani insangu?  
(PLEASE SELECT ALL THAT APPLY)

- Neze nhlobo    kanye    ngezinye izikhathi    kani

Onyakeni odlule, uyibheme kani kanganani iNdanda noma ama-mandrax?

- Neze nhlobo    kanye    ngezinye izikhathi    kani

Onyakeni odlule, uyibheme kani kanganani iNyaopi noma i-whoonga?

- Neze nhlobo    kanye    ngezinye izikhathi    kani

Onyakeni odlule, uwuphuze kani kanganani umuthi wokukhwehlela ungaguli?

- Neze nhlobo    kanye    ngezinye izikhathi    kani

Onyakeni odlule, uwaphuze kani kanganani amaphilisi ezinhlungu ungaguli?

- Neze nhlobo    kanye    ngezinye izikhathi    kani

Onyakeni odlule, uyibheme kani kanganani i-Mg (Ecstasy)?

- Neze nhlobo    kanye    ngezinye izikhathi    kani

Onyakeni odlule, uyibheme kani kanganani i-Njumpi (Crystal Meth/Tik)?

- Neze nhlobo    kanye    ngezinye izikhathi    kani

Onyakeni odlule, uyibheme kani kanganani i-Glass/Rock?

- Neze nhlobo    kanye    ngezinye izikhathi    kani

## Self Esteem

---

---

**For each statement please select either strongly agree, agree, disagree or strongly disagree.**

Most of the time I am satisfied with myself

Strongly Agree  Agree  Disagree  Strongly Disagree

At times, I think I am no good at all

Strongly Agree  Agree  Disagree  Strongly Disagree

I feel that I have a number of good qualities

Strongly Agree  Agree  Disagree  Strongly Disagree

I am able to do things as well as most other people

Strongly Agree  Agree  Disagree  Strongly Disagree

I feel I do not have much to be proud of

Strongly Agree  Agree  Disagree  Strongly Disagree

I certainly feel useless at times

Strongly Agree  Agree  Disagree  Strongly Disagree

I feel that I'm a person of worth, at least equal or as good as other people

Strongly Agree  Agree  Disagree  Strongly Disagree

I wish I could have more respect for myself

Strongly Agree  Agree  Disagree  Strongly Disagree

Most of the time I feel as if I am a failure

Strongly Agree  Agree  Disagree  Strongly Disagree

I take a positive attitude toward myself

Strongly Agree  Agree  Disagree  Strongly Disagree

---

---

**For each statement please select either strongly agree, agree, disagree or strongly disagree.**

Boholo ba nako ke kgotsofetse ka seo ke leng sona.

Ke Dumela Ke Tiile  Ke a Dumela  Ke a Hana  Ke Hana ke Tiile

Ka dinako tse ding ke nahana hore ha ke na molemo ho hang

Ke Dumela Ke Tiile  Ke a Dumela  Ke a Hana  Ke Hana ke Tiile

Ke ikutlwa eka ke na le dintho tse mmalwa tse ntle ka nna

Ke Dumela Ke Tiile  Ke a Dumela  Ke a Hana  Ke Hana ke Tiile

Ke kgona ho etsa dintho mmoho le boholo ba batho

Ke Dumela Ke Tiile  Ke a Dumela  Ke a Hana  Ke Hana ke Tiile

Ke ikutlwa eka ha ke na dintho tse ngata tse nketsang motlotlo

Ke Dumela Ke Tiile  Ke a Dumela  Ke a Hana  Ke Hana ke Tiile

Bonneteng ke ikutlwa ke se na molemo ka dinako tse ding

Ke Dumela Ke Tiile  Ke a Dumela  Ke a Hana  Ke Hana ke Tiile

Ke ikutlwa ke le motho wa bohlokwa, bonyane ho lekana kapa ho ba bohlokwa jwalo ka batho ba bang

Ke Dumela Ke Tiile  Ke a Dumela  Ke a Hana  Ke Hana ke Tiile

Ke lakatsa eka nka itlhompha ho feta

Ke Dumela Ke Tiile  Ke a Dumela  Ke a Hana  Ke Hana ke Tiile

Boholo ba nako ke ikutlwa eka ke hloleha ho atleha

Ke Dumela Ke Tiile  Ke a Dumela  Ke a Hana  Ke Hana ke Tiile

Ke ba le mekgwa e phosethifi ya ho nahana ka nna

Ke Dumela Ke Tiile  Ke a Dumela  Ke a Hana  Ke Hana ke Tiile

**For each statement please select either strongly agree, agree, disagree or strongly disagree.**

Kukho konke, nganelisekile ngalokho engiyikho.

Ngiyavuma Kakhulu  Ngiyavuma  Angivumi  Angivumi Kakhulu

Ngezinye izikhathi, ngicabanga ukuthi angikho kahle nhlobo

Ngiyavuma Kakhulu  Ngiyavuma  Angivumi  Angivumi Kakhulu

Ngicabanga ukuthi nginezinto eziseqophelweni eliphezulu ezinhle eziningana

Ngiyavuma Kakhulu  Ngiyavuma  Angivumi  Angivumi Kakhulu

Ngiyakwazi ukwenza izinto njengabantu abanye abaningi

Ngiyavuma Kakhulu  Ngiyavuma  Angivumi  Angivumi Kakhulu

Ngicabanga ukuthi anginakho okuningi engingaziqhenya ngakho

Ngiyavuma Kakhulu  Ngiyavuma  Angivumi  Angivumi Kakhulu

Ngokuseqiniswa ngizwa ngingenamsebenzi walutho ngezinye izikhathi

- Ngiyavuma Kakhulu
- Ngiyavuma
- Angivumi
- Angivumi Kakhulu

Ngicabanga ukuthi ngingumuntu obalulekile, okungenani olinganayo noma omuhle njengabanye abantu

- Ngiyavuma Kakhulu
- Ngiyavuma
- Angivumi
- Angivumi Kakhulu

Ngifisa sengathi ngingazihlonipha kakhulu

- Ngiyavuma Kakhulu
- Ngiyavuma
- Angivumi
- Angivumi Kakhulu

Esikhathini esiningi ngizwa sengathi ngiyisehluleki

- Ngiyavuma Kakhulu
- Ngiyavuma
- Angivumi
- Angivumi Kakhulu

Indlela yokucabanga enhle ngiyibhekisa kimi

- Ngiyavuma Kakhulu
- Ngiyavuma
- Angivumi
- Angivumi Kakhulu

# Final

## END OF INTERVIEW

I would like to thank you very much for helping us. We have talked about some very difficult things today. I appreciate the time you have taken. I realise that these questions may have been difficult for you to answer, but it is only by hearing about women's lives that we can really begin to understand them. We really appreciate your openness with us. Most women have difficult times in their lives and it's good to share them and remember we did not bring them on ourselves. We really appreciate your participation in this study. By sharing this personal information with us and attending the SSWP peer talks and creative spaces you are helping us with our research and that will ultimately help many other sex workers in the country.

In the past 6 months have you received either of these items (SHOW A RED UMBRELLA CONDOM AND LUBRICANT) from a PE?

Yes

No

Last year, between January 2015 and December 2015, did you come to the SSWP clinic and do an HIV test? (ONLY YES IF THEY DID AN HIV TEST. DO NOT NOTE YES IF THEY DID ANYTHING ELSE WITH US!!!!)

Yes  No

Could we contact you for any future research studies which may either be related to or unrelated to this study?

No  Yes

## END OF INTERVIEW

Ke rata ho o leboha haholo ka ho re thusa. Re buile ka dintho tse itseng tse boima haholo kajeno. Ke thabela nako eo o bileng le yona. Ke ehlwa hore dipotso tse na di ka be di bile boima hore o di arabe, empa ke ka ho utlwa ka maphelo a basadi re ka qalang ho a utlwisa. Re thabela ho phuthulloha ha hao ho rona e le ka nnete. Basadi ba bangata ba imetswe maphelong a bona mme ke ntho e ntle ho bua ka oona le ho hopola hore ha re a ipitsetsa oona. Re thabela ho nka karolo ha hao phuputso ena e le ka nnete. Ka ho bua le rona ka ditaba tse na tsa bophelo ba hao le ho kenela dipuisano tsa bomphato tsa SSWP le dicreative space, o re thusa ka phuputso ya rona mme hoo ho tla qetella ho thusa disex worker tse ding tse ngata naheng.

Na re ka iteanya le wena bakeng sa phuputso efe kapa efe ya nako e tlang e ka beng e amana kapa e sa amane le phuputso ena?

Tjhe  E

## END OF INTERVIEW

Ngiyabonga kakhulu ngokuthi usize. Sikhulume ngezinto ezinzima kakhulu namhlanje. Ngiyathokoza ngesikhathi osithathile. Ngiyazi ukuthi le mibuzo kungenzeka ukuthi beyinzima ukuthi uyiphendule, kodwa wukuzwa ngezimpilo zabantu besifazane kuphela okungasenza ukuthi siqale ukubaqonda. Siyakuthokozela kakhulu ukuvuleleka kwakho kithi. Abesifazane abaningi kakhulu banezikhathi ezinzima ezimpilweni zabo futhi kuhle ukushiyelana nabo futhi khumbula ukuthi asibalethanga kithi. Siyakuthokozela kakhulu ukuhlanganyela kwakho kulolu cwaningo. Ngokushiyelana ngalolu lwazi lomuntu siqu nokuza ezingxoxweni zontanga ze-SSWP nasezindaweni zokusungula osiza ngocwaningo lwethu nokuthi ekugcineni luyosiza amanye ama-sex worker amaningi ezweni.

Singaxhumana nawe ngananoma yiziphi izingcwaningo zohlolo lwesikhathi esizayo okungenzeka luhambisane noma lungahambisani nalolu cwaningo?

Cha  Yebo

End Time of Interview

\_\_\_\_\_

This interview took \_\_\_minutes to complete

\_\_\_\_\_  
(INSERT CALC FOR DATE TIME)

# Hct

---



---

## HIV COUNSELLING and TESTING

Thank you, for taking this survey with me. Now that we have completed the survey, I am going to to explain what an HIV test is and what the results mean. I will then test you and while we wait for the results we can discuss ways to reduce your risk. You have already signed consent to do the test, so we will not need to sign consent again now.

### Pre Counselling Received

(EXPLAIN THE HCT PROCESS Two rapid test for HIV will be done by either myself or the nurse. A few drops of blood will be collected and tested on specific HIV testing kits to check for HIV antibodies. Test results will be ready in about 10 minutes. If both tests show us a negative result then it means that there are no antibodies to HIV. (Counsellor explains again about the window period). If both tests are positive, it means that you are HIV positive and that there are antibodies to HIV. Sometimes we cannot clearly tell if the results are negative or positive, so we have have 1 test show us a positive and the other show us a negative result. We will then have the nurse draw blood which we will send through to the laboratory for an HIV test called an ELISA to confirm the results. If you are HIV positive, they will also do your CD4 count and viral load. You will be able to get your laboratory results back from us in a week. )

Yes  No

### First Rapid Test

Reactive (Positive)  Non-Reactive (Negative)  Indeterminate

### Second Rapid Test

Reactive (Positive)  Non-Reactive (Negative)  Indeterminate

HIV NEGATIVE No further biological tests required. Participant can now return to coupon manager

HIV POSITIVE RESULT inform participant of their status and conduct CD4 and viral load. Once completed participant can return to coupon manager

INDETERMINATE RESULT Call nurse to draw blood and send to NHLS for HIV test (& CD4, Viral load). Once blood drawn participant can move on to coupon manager

### Did you negotiate a risk reduction plan

(IDENTIFY RISK REDUCTION BEHAVIOURS. IT IS VERY IMPORTANT THAT THE PARTICIPANT UNDERSTANDS THAT THE USE OF CONDOMS WITH INTIMATE PARTNERS IS AS IMPORTANT AS IT IS WITH MCIMBI IN PROTECTING THEMSELVES, THEIR PARTNER AND THEIR CLIENTS, FROM HIV AND STIS. EXPLORE RISKY SEX WORKER BEHAVIOURS MENTIONED IN THEIR QUESTIONNAIRE AND WHICH THEY ARE ABLE & MOTIVATED TO CHANGE. IDENTIFY A STEP TOWARDS CHANGING THIS BEHAVIOUR. BREAK THE BEHAVIOUR DOWN INTO CONCRETE STEPS FOR THE CLIENT TO TRY. CHECK IN WITH THE CLIENT TO ENSURE THAT THE PLAN IS ACCEPTABLE AND ACTIONABLE FOR THEM - THEY SHOULD TAKE OWNERSHIP OF THE PLAN. YOU CAN ROLE PLAY THE PLAN TO ASSIST THE CLIENT. ASK THE CLIENT TO TRY THE PLAN OUT. MAKE SURE THEY KNOW THEY CAN COME BACK TO US FOR FUTURE ADVICE OR COUNSELLING TO ADAPT THIS PLAN. RECOGNISE HOW HARD IT CAN BE TO CHANGE BEHAVIOUR AND THE DANGERS SURROUNDING SEX WORK, BUT THAT THE PROGRAMME IS HERE TO SUPPORT THEM. IF THEY ARE NOT FAMILIAR WITH SSWP, PLEASE TELL THEM ABOUT US AND INVITE THEM TO COME TO OUR CREATIVE SPACE WORKSHOPS OR TAKE THEIR DETAILS DOWN TO DO OUTREACH IN THEIR AREA (SOWETO ONLY))

Yes  No



---

---

**COMPLETED BY THE NURSE**

Tests sent  
(ONLY SEND UNKNOWN POSITIVES TO CLS)

- Confirmatory Elisa assay (NHLS)    CD4 (NHLS)    Viral Load (CLS)    Drug Resistance (NICD)

CLS Laboratory Bar Code

---

NHLS Laboratory Bar Code

---

Confirmatory Elisa Result

- Negative    Positive

CD4 count result

---

(NUMBER)

Viral Load result

---



## B5 Art Drug Resistance

Drug Resistance Tested

Yes

No

Susceptible to all

Yes

No

Zidovudine

S/PLLR  LLR/IR  HLR

Didanosine

S/PLLR  LLR/IR  HLR

Stavudine

S/PLLR  LLR/IR  HLR

Lamuvudine

S/PLLR  LLR/IR  HLR

Emtricitabine

S/PLLR  LLR/IR  HLR

Abacavir

S/PLLR  LLR/IR  HLR

Tenofovir

S/PLLR  LLR/IR  HLR

Nevirapine

S/PLLR  LLR/IR  HLR

Efavirenz

S/PLLR  LLR/IR  HLR

Etravirine

S/PLLR  LLR/IR  HLR

Rilpivirine

S/PLLR  LLR/IR  HLR

Indinavir/r

S/PLLR  LLR/IR  HLR

Saquinavir/r

S/PLLR  LLR/IR  HLR

Nelfinavir

S/PLLR  LLR/IR  HLR

Fosamprenavir/r

S/PLLR  LLR/IR  HLR

Lopinavir/r

S/PLLR  LLR/IR  HLR

Atazanavir/r

S/PLLR  LLR/IR  HLR

Tiplonavir/r

S/PLLR  LLR/IR  HLR

Darunavir/r

S/PLLR  LLR/IR  HLR
